# Supplementary material
Source: PubMed Central journal article supplement (PMC3592722)
Supplement: june-9-66-s001.pdf [file june-9-66-s001.pdf]

| UnitID | Program Name       | Institution Name                            | Reported # of graduates for each program (2008-2009): |          |          |
|--------|--------------------|---------------------------------------------|-------------------------------------------------------|----------|----------|
|        |                    |                                             | Bachelor's                                            | Master's | Doctoral |
| 210669 | Neuroscience       | Allegheny College                           | 28                                                    |          |          |
| 164465 | Neuroscience       | Amherst College                             | 10                                                    |          |          |
| 201195 | Neuroscience       | Baldwin-Wallace College                     | 2                                                     |          |          |
| 189097 | Neuroscience       | Barnard College                             | 31                                                    |          |          |
| 160977 | Neuroscience       | Bates College                               | 8                                                     |          |          |
| 223223 | Neuroscience       | Baylor College of Medicine                  |                                                       | 0        | 11       |
| 223232 | Neuroscience       | Baylor University                           | 22                                                    |          |          |
| 164988 | Neuroscience       | Boston University                           | 25                                                    | 0        |          |
| 164988 | Neurobio/neurophys | Boston University                           |                                                       | 9        |          |
| 161004 | Neuroscience       | Bowdoin College                             | 19                                                    |          |          |
| 201441 | Neuroscience       | Bowling Green State University-Main Campus  | 3                                                     |          |          |
| 165015 | Neuroscience       | Brandeis University                         | 21                                                    | 6        |          |
| 230038 | Neuroscience       | Brigham Young University                    | 61                                                    | 1        |          |
| 217156 | Neuroscience       | Brown University                            | 47                                                    | 0        |          |
| 211291 | Neuroscience       | Bucknell University                         | 14                                                    |          |          |
| 110404 | Neuroscience       | California Institute of Technology          | 3                                                     | 1        | 9        |
| 173258 | Neuroscience       | Carleton College                            | 0                                                     |          |          |
| 211440 | Neuroscience       | Carnegie Mellon University                  | 1                                                     |          |          |
| 238476 | Neuroscience       | Carthage College                            | 3                                                     |          |          |
| 201645 | Neuroscience       | Case Western Reserve University             |                                                       |          | 7        |
| 211468 | Neuroscience       | Cedar Crest College                         | 4                                                     |          |          |
| 158477 | Neuroscience       | Centenary College of Louisiana              | 2                                                     |          |          |
| 169248 | Neuroscience       | Central Michigan University                 | 8                                                     |          |          |
| 112260 | Neuroscience       | Claremont McKenna College                   | 10                                                    |          |          |
| 153144 | Neuroscience       | Coe College                                 | 0                                                     |          |          |
| 161086 | Neuroscience       | Colby College                               | 8                                                     |          |          |
| 190099 | Neuroscience       | Colgate University                          | 19                                                    |          |          |
| 126678 | Neuroscience       | Colorado College                            | 8                                                     |          |          |
| 190150 | Neuroscience       | Columbia University in the City of New York | 37                                                    | 9        | 15       |

| UnitID | Program Name       | Institution Name                                  | Reported # of graduates for each program (2008-2009): |          |          |
|--------|--------------------|---------------------------------------------------|-------------------------------------------------------|----------|----------|
|        |                    |                                                   | Bachelor's                                            | Master's | Doctoral |
| 128902 | Neuroscience       | Connecticut College                               | 8                                                     |          |          |
| 190415 | Neuroscience       | Cornell University                                |                                                       | 1        | 10       |
| 190558 | Neuroscience       | CUNY College of Staten Island                     |                                                       | 8        |          |
| 182670 | Neuroscience       | Dartmouth College                                 | 30                                                    |          | 0        |
| 130934 | Neuroscience       | Delaware State University                         |                                                       | 0        |          |
| 212009 | Neuroscience       | Dickinson College                                 | 12                                                    |          |          |
| 153269 | Neuroscience       | Drake University                                  | 9                                                     |          |          |
| 184348 | Neuroscience       | Drew University                                   | 8                                                     |          |          |
| 212054 | Neuroscience       | Drexel University                                 |                                                       | 2        |          |
| 212133 | Neuroscience       | Eastern University                                | 1                                                     |          |          |
| 165671 | Neuroscience       | Emmanuel College                                  | 5                                                     |          |          |
| 139658 | Neuroscience       | Emory University                                  | 84                                                    |          |          |
| 129242 | Neuroscience       | Fairfield University                              | 0                                                     |          |          |
| 134097 | Neuroscience       | Florida State University                          |                                                       |          | 7        |
| 212577 | Neuroscience       | Franklin and Marshall College                     | 14                                                    |          |          |
| 218070 | Neuroscience       | Furman University                                 | 12                                                    |          |          |
| 232186 | Neuroscience       | George Mason University                           | 3                                                     |          |          |
| 131469 | Neuroscience       | George Washington University                      |                                                       |          | 1        |
| 131496 | Neurobio/neurophys | Georgetown University                             | 5                                                     |          |          |
| 191515 | Neuroscience       | Hamilton College                                  | 15                                                    |          |          |
| 166018 | Neurobio/neurophys | Hampshire College                                 | 4                                                     |          |          |
| 166027 | Neurobio/neurophys | Harvard University                                | 29                                                    |          |          |
| 203128 | Neuroscience       | Hiram College                                     | 2                                                     |          |          |
| 151351 | Neuroscience       | Indiana University-Bloomington                    | 17                                                    |          | 2        |
| 151111 | Neurobio/neurophys | Indiana University-Purdue University-Indianapolis |                                                       |          | 3        |
| 153603 | Neuroscience       | Iowa State University                             |                                                       | 1        | 4        |
| 162928 | Neuroscience       | Johns Hopkins University                          | 75                                                    | 4        |          |
| 203517 | Neuroscience       | Kent State University Kent Campus                 |                                                       | 1        |          |
| 203535 | Neuroscience       | Kenyon College                                    | 8                                                     |          |          |

| UnitID | Program Name       | Institution Name                                                 | Reported # of graduates for each program (2008-2009): |          |          |
|--------|--------------------|------------------------------------------------------------------|-------------------------------------------------------|----------|----------|
|        |                    |                                                                  | Bachelor's                                            | Master's | Doctoral |
| 220516 | Neuroscience       | King College                                                     | 5                                                     |          |          |
| 213321 | Neuroscience       | King's College                                                   | 10                                                    |          |          |
| 146427 | Neuroscience       | Knox College                                                     | 3                                                     |          |          |
| 213385 | Neuroscience       | Lafayette College                                                | 11                                                    |          |          |
| 213543 | Neuroscience       | Lehigh University                                                | 32                                                    | 0        |          |
| 159373 | Neuroscience       | Louisiana State University Health Sciences Center at New Orleans |                                                       | 0        | 4        |
| 146719 | Neuroscience       | Loyola University Chicago                                        |                                                       | 0        |          |
| 173902 | Neuroscience       | Macalester College                                               | 5                                                     |          |          |
| 166683 | Neuroscience       | Massachusetts Institute of Technology                            | 45                                                    | 1        |          |
| 365426 | Neuroscience       | Mayo Graduate School                                             |                                                       | 0        | 2        |
| 140401 | Neuroscience       | Medical College of Georgia                                       |                                                       |          | 2        |
| 171100 | Neuroscience       | Michigan State University                                        |                                                       |          | 8        |
| 230959 | Neuroscience       | Middlebury College                                               | 24                                                    |          |          |
| 180461 | Neurobio/neurophys | Montana State University                                         |                                                       |          | 0        |
| 214157 | Neuroscience       | Moravian College and Moravian Theological Seminary               | 1                                                     |          |          |
| 166939 | Neuroscience       | Mount Holyoke College                                            | 20                                                    |          |          |
| 204185 | Neuroscience       | Mount Union College                                              | 4                                                     |          |          |
| 214175 | Neuroscience       | Muhlenberg College                                               | 15                                                    |          |          |
| 204264 | Neuroscience       | Muskingum University                                             | 0                                                     |          |          |
| 204264 | Neurobio/neurophys | Muskingum University                                             | 3                                                     |          |          |
| 193900 | Neuroscience       | New York University                                              | 17                                                    | 0        | 3        |
| 167358 | Neuroscience       | Northeastern University                                          | 43                                                    |          |          |
| 147767 | Neurobio/neurophys | Northwestern University                                          |                                                       | 4        |          |
| 147767 | Neuroscience       | Northwestern University                                          | 0                                                     |          |          |
| 204501 | Neuroscience       | Oberlin College                                                  | 21                                                    |          |          |
| 204909 | Neuroscience       | Ohio Wesleyan University                                         | 1                                                     |          |          |
| 209490 | Neuroscience       | Oregon Health & Science University                               |                                                       | 1        |          |
| 214616 | Neuroscience       | Pennsylvania State University-College of Medicine                |                                                       | 2        |          |
| 121257 | Neuroscience       | Pitzer College                                                   | 4                                                     |          |          |

| UnitID | Program Name       | Institution Name                                         | Reported # of graduates for each program (2008-2009): |          |          |
|--------|--------------------|----------------------------------------------------------|-------------------------------------------------------|----------|----------|
|        |                    |                                                          | Bachelor's                                            | Master's | Doctoral |
| 121345 | Neuroscience       | Pomona College                                           | 24                                                    |          |          |
| 127918 | Neuroscience       | Regis University                                         | 7                                                     |          |          |
| 221351 | Neuroscience       | Rhodes College                                           | 8                                                     |          |          |
| 145558 | Neuroscience       | Rosalind Franklin University of Medicine and Science     |                                                       | 0        | 1        |
| 148511 | Neuroscience       | Rush University                                          |                                                       | 0        | 3        |
| 186380 | Neuroscience       | Rutgers University-New Brunswick                         |                                                       |          | 0        |
| 186380 | Neurobio/neurophys | Rutgers University-New Brunswick                         |                                                       |          | 6        |
| 186399 | Neuroscience       | Rutgers University-Newark                                |                                                       | 1        | 3        |
| 154235 | Neuroscience       | Saint Ambrose University                                 | 2                                                     |          |          |
| 123165 | Neuroscience       | Scripps College                                          | 7                                                     |          |          |
| 195526 | Neuroscience       | Skidmore College                                         | 9                                                     |          |          |
| 167835 | Neuroscience       | Smith College                                            | 28                                                    |          |          |
| 195216 | Neuroscience       | St Lawrence University                                   | 16                                                    |          |          |
| 243744 | Neuroscience       | Stanford University                                      |                                                       | 1        | 19       |
| 167996 | Neuroscience       | Stonehill College                                        | 5                                                     |          |          |
| 196097 | Neuroscience       | Stony Brook University                                   |                                                       |          | 1        |
| 196255 | Neuroscience       | SUNY Health Science Center at Brooklyn                   |                                                       |          | 4        |
| 196307 | Neuroscience       | SUNY Health Science Center at Syracuse                   |                                                       |          | 1        |
| 196413 | Neuroscience       | Syracuse University                                      |                                                       | 1        |          |
| 216339 | Neuroscience       | Temple University                                        |                                                       |          | 1        |
| 228875 | Neuroscience       | Texas Christian University                               | 5                                                     |          |          |
| 206589 | Neuroscience       | The College of Wooster                                   | 1                                                     |          |          |
| 180489 | Neuroscience       | The University of Montana                                |                                                       | 0        | 3        |
| 228778 | Neuroscience       | The University of Texas at Austin                        |                                                       | 3        |          |
| 228787 | Neuroscience       | The University of Texas at Dallas                        | 49                                                    |          | 4        |
| 229027 | Neuroscience       | The University of Texas at San Antonio                   |                                                       | 0        | 3        |
| 229300 | Neuroscience       | The University of Texas Health Science Center at Houston |                                                       | 3        | 6        |
| 216357 | Neuroscience       | Thiel College                                            | 0                                                     |          |          |
| 216366 | Neuroscience       | Thomas Jefferson University                              |                                                       | 1        |          |

| UnitID | Program Name       | Institution Name                       | Reported # of graduates for each program (2008-2009): |          |          |
|--------|--------------------|----------------------------------------|-------------------------------------------------------|----------|----------|
|        |                    |                                        | Bachelor's                                            | Master's | Doctoral |
| 130590 | Neuroscience       | Trinity College                        | 16                                                    |          |          |
| 229267 | Neuroscience       | Trinity University                     | 10                                                    |          |          |
| 160755 | Neuroscience       | Tulane University of Louisiana         | 60                                                    | 26       | 4        |
| 196866 | Neuroscience       | Union College                          | 14                                                    |          |          |
| 196088 | Neuroscience       | University at Buffalo                  |                                                       | 3        | 1        |
| 100663 | Neurobio/neurophys | University of Alabama at Birmingham    |                                                       |          | 10       |
| 104179 | Neuroscience       | University of Arizona                  |                                                       | 0        |          |
| 110635 | Neuroscience       | University of California-Berkeley      |                                                       | 2        | 5        |
| 110644 | Neuroscience       | University of California-Davis         |                                                       | 1        | 7        |
| 110644 | Neurobio/neurophys | University of California-Davis         | 180                                                   |          |          |
| 110653 | Neurobio/neurophys | University of California-Irvine        |                                                       |          | 9        |
| 110653 | Neuroscience       | University of California-Irvine        | 23                                                    |          |          |
| 110662 | Neurobio/neurophys | University of California-Los Angeles   |                                                       | 1        | 4        |
| 110662 | Neuroscience       | University of California-Los Angeles   | 97                                                    |          | 16       |
| 110671 | Neuroscience       | University of California-Riverside     | 35                                                    |          | 4        |
| 110680 | Neuroscience       | University of California-San Diego     |                                                       |          | 9        |
| 110680 | Neurobio/neurophys | University of California-San Diego     | 93                                                    |          |          |
| 110699 | Neuroscience       | University of California-San Francisco |                                                       | 2        | 17       |
| 110714 | Neuroscience       | University of California-Santa Cruz    | 28                                                    |          |          |
| 201885 | Neuroscience       | University of Cincinnati-Main Campus   | 2                                                     |          | 4        |
| 126614 | Neuroscience       | University of Colorado at Boulder      |                                                       |          | 7        |
| 126562 | Neuroscience       | University of Colorado Denver          |                                                       |          | 4        |
| 150534 | Neuroscience       | University of Evansville               | 1                                                     |          |          |
| 139959 | Neuroscience       | University of Georgia                  |                                                       |          | 1        |
| 129525 | Neuroscience       | University of Hartford                 |                                                       | 0        |          |
| 145600 | Neuroscience       | University of Illinois at Chicago      | 23                                                    |          |          |
| 153658 | Neurobio/neurophys | University of Iowa                     |                                                       |          | 7        |
| 155317 | Neuroscience       | University of Kansas                   |                                                       | 1        |          |
| 163259 | Neuroscience       | University of Maryland-Baltimore       |                                                       | 0        |          |

| UnitID | Program Name       | Institution Name                                          | Reported # of graduates for each program (2008-2009): |          |          |
|--------|--------------------|-----------------------------------------------------------|-------------------------------------------------------|----------|----------|
|        |                    |                                                           | Bachelor's                                            | Master's | Doctoral |
| 163268 | Neuroscience       | University of Maryland-Baltimore County                   |                                                       | 0        |          |
| 163286 | Neuroscience       | University of Maryland-College Park                       |                                                       | 0        |          |
| 166629 | Neuroscience       | University of Massachusetts Amherst                       |                                                       | 5        |          |
| 187222 | Neuroscience       | University of Medicine and Dentistry of New Jersey        |                                                       | 1        | 14       |
| 135726 | Neuroscience       | University of Miami                                       | 39                                                    |          |          |
| 170976 | Neuroscience       | University of Michigan-Ann Arbor                          | 142                                                   | 3        |          |
| 174066 | Neuroscience       | University of Minnesota-Twin Cities                       | 31                                                    | 2        |          |
| 178396 | Neurobio/neurophys | University of Missouri-Columbia                           |                                                       | 1        |          |
| 182290 | Neuroscience       | University of Nevada-Reno                                 | 2                                                     |          |          |
| 199120 | Neurobio/neurophys | University of North Carolina at Chapel Hill               |                                                       | 0        | 4        |
| 207342 | Neurobio/neurophys | University of Oklahoma Health Sciences Center             |                                                       | 0        | 0        |
| 207342 | Neuroscience       | University of Oklahoma Health Sciences Center             |                                                       | 1        | 1        |
| 207500 | Neuroscience       | University of Oklahoma Norman Campus                      |                                                       |          | 0        |
| 215062 | Neuroscience       | University of Pennsylvania                                | 94                                                    | 2        | 22       |
| 215293 | Neurobio/neurophys | University of Pittsburgh-Pittsburgh Campus                |                                                       | 1        |          |
| 215293 | Neuroscience       | University of Pittsburgh-Pittsburgh Campus                | 89                                                    | 2        |          |
| 195030 | Neuroscience       | University of Rochester                                   |                                                       | 2        |          |
| 215929 | Neuroscience       | University of Scranton                                    | 10                                                    |          |          |
| 123961 | Neuroscience       | University of Southern California                         | 77                                                    | 1        | 8        |
| 174914 | Neuroscience       | University of St Thomas                                   | 0                                                     |          |          |
| 228635 | Neuroscience       | University of Texas Southwestern Medical Center at Dallas |                                                       | 1        | 21       |
| 206084 | Neuroscience       | University of Toledo                                      |                                                       |          | 2        |
| 230764 | Neurobio/neurophys | University of Utah                                        |                                                       | 0        |          |
| 231174 | Neuroscience       | University of Vermont                                     |                                                       | 0        |          |
| 234076 | Neuroscience       | University of Virginia-Main Campus                        |                                                       |          | 2        |
| 236948 | Neurobio/neurophys | University of Washington-Seattle Campus                   | 49                                                    |          | 6        |
| 240444 | Neuroscience       | University of Wisconsin-Madison                           |                                                       | 2        |          |
| 240727 | Neuroscience       | University of Wyoming                                     |                                                       | 1        |          |
| 216524 | Neuroscience       | Ursinus College                                           | 10                                                    |          |          |

| UnitID | Program Name       | Institution Name                  | Reported # of graduates for each program (2008-2009): |           |           |
|--------|--------------------|-----------------------------------|-------------------------------------------------------|-----------|-----------|
|        |                    |                                   | Bachelor's                                            | Master's  | Doctoral  |
| 221999 | Neuroscience       | Vanderbilt University             | 33                                                    |           |           |
| 197133 | Neuroscience       | Vassar College                    | 17                                                    |           |           |
| 199847 | Neuroscience       | Wake Forest University            |                                                       |           | 5         |
| 234207 | Neuroscience       | Washington and Lee University     | 9                                                     |           |           |
| 236939 | Neuroscience       | Washington State University       | 26                                                    | 1         | 3         |
| 179867 | Neuroscience       | Washington University in St Louis | 32                                                    |           |           |
| 172644 | Neurobio/neurophys | Wayne State University            |                                                       |           | 0         |
| 190424 | Neuroscience       | Weill Cornell Medical College     |                                                       | 2         |           |
| 168218 | Neuroscience       | Wellesley College                 | 21                                                    |           |           |
| 237011 | Neuroscience       | Western Washington University     | 7                                                     |           |           |
| 230807 | Neuroscience       | Westminster College               | 2                                                     |           |           |
| 216807 | Neurobio/neurophys | Westminster College               | 3                                                     |           |           |
| 130794 | Neurobio/neurophys | Yale University                   |                                                       | 0         |           |
| 130794 | Neuroscience       | Yale University                   |                                                       | 1         |           |
| 197708 | Neuroscience       | Yeshiva University                |                                                       | 9         | 7         |
|        |                    | <b>COUNT:</b>                     | <b>112</b>                                            | <b>69</b> | <b>62</b> |
