# Supplementary material
Source: PubMed Central journal article supplement (PMC3592722)
Supplement: june-9-66-s002.pdf [file june-9-66-s002.pdf]

TABLE 2: PROGRAMS

| Program Name | Institution Name                            | Address                                                                |
|--------------|---------------------------------------------|------------------------------------------------------------------------|
| Neuroscience | Allegheny College                           | 520 N Main St, Meadville, Pennsylvania 16335-3902                      |
| Neuroscience | Amherst College                             | Boltwood Avenue, Amherst, Massachusetts 01002-5000                     |
| Neuroscience | Baldwin-Wallace College                     | 275 Eastland Rd, Berea, Ohio 44017-2088                                |
| Neuroscience | Barnard College                             | 3009 Broadway, New York, New York 10027-6598                           |
| Neuroscience | Bates College                               | 2 Andrews Road, Lewiston, Maine 04240                                  |
| Neuroscience | Baylor University                           | 500 Speight Ave., Waco, Texas 76798                                    |
| Neuroscience | Boston University                           | One Silber Way, Boston, Massachusetts 02215                            |
| Neuroscience | Bowdoin College                             | 5700 College Station - President's Office, Brunswick, Maine 04011-8448 |
| Neuroscience | Bowling Green State University-Main Campus  | 220 McFall Ctr, Bowling Green, Ohio 43403                              |
| Neuroscience | Brandeis University                         | 415 South St, Waltham, Massachusetts 02454-9110                        |
| Neuroscience | Brigham Young University                    | Main Campus, Provo, Utah 84602                                         |
| Neuroscience | Brown University                            | One Prospect Street, Providence, Rhode Island 02912                    |
| Neuroscience | Bucknell University                         | Dent Drive, Lewisburg, Pennsylvania 17837                              |
| Neuroscience | California Institute of Technology          | 1200 E California Blvd, Pasadena, California 91125                     |
| Neuroscience | Carleton College                            | One North College Street, Northfield, Minnesota 55057-4001             |
| Neuroscience | Carnegie Mellon University                  | 5000 Forbes Ave, Pittsburgh, Pennsylvania 15213-3890                   |
| Neuroscience | Carthage College                            | 2001 Alford Park Dr, Kenosha, Wisconsin 53140-1994                     |
| Neuroscience | Cedar Crest College                         | 100 College Drive, Allentown, Pennsylvania 18104-6196                  |
| Neuroscience | Centenary College of Louisiana              | 2911 Centenary Boulevard, Shreveport, Louisiana 71134-1188             |
| Neuroscience | Central Michigan University                 | Mount Pleasant, Michigan 48859                                         |
| Neuroscience | Claremont McKenna College                   | 500 E 9th St, Claremont, California 91711-6400                         |
| Neuroscience | Coe College                                 | 1220 First Ave NE, Cedar Rapids, Iowa 52402-5092                       |
| Neuroscience | Colby College                               | 4000 Mayflower Hill Drive, Waterville, Maine 04901-8840                |
| Neuroscience | Colgate University                          | 13 Oak Dr, Hamilton, New York 13346-1398                               |
| Neuroscience | Colorado College                            | 14. E Cache La Poudre St., Colorado Springs, Colorado 80903            |
| Neuroscience | Columbia University in the City of New York | 116 St and Broadway, New York, New York 10027                          |
| Neuroscience | Connecticut College                         | 270 Mohegan Ave, New London, Connecticut 06320                         |
| Neuroscience | Dartmouth College                           | Hanover, New Hampshire 03755-3529                                      |
| Neuroscience | Dickinson College                           | College and Louthier Streets, Carlisle, Pennsylvania 17013-2896        |
| Neuroscience | Drake University                            | 2507 University Avenue, Des Moines, Iowa 50311-4505                    |

TABLE 2: PROGRAMS

| Institution Name                            | Phone                | Homepage                   | Type                           |
|---------------------------------------------|----------------------|----------------------------|--------------------------------|
| Allegheny College                           | (814) 332-3100       | www.allegheny.edu          | 4-year, Private not-for-       |
| Amherst College                             | (413) 542-2000       | www.amherst.edu            | 4-year, Private not-for-       |
| Baldwin-Wallace College                     | (440) 826-2900       | www.bw.edu                 | 4-year, Private not-for-       |
| Barnard College                             | (212) 854-5262       | www.barnard.edu            | 4-year, Private not-for-       |
| Bates College                               | (207) 786-6000       | www.bates.edu/             | 4-year, Private not-for-       |
| Baylor University                           | (254) 710-1011       | www.baylor.edu             | 4-year, Private not-for-       |
| Boston University                           | (617) 353-2000       | www.bu.edu                 | 4-year, Private not-for-       |
| Bowdoin College                             | (207) 725-3000       | www.bowdoin.edu            | 4-year, Private not-for-       |
| Bowling Green State University-Main Campus  | (419) 372-2531       | www.bgsu.edu               | 4-year, Public                 |
| Brandeis University                         | (781) 736-2000       | www.brandeis.edu/          | 4-year, Private not-for-       |
| Brigham Young University                    | (801) 422-4636       | www.byu.edu                | 4-year, Private not-for-       |
| Brown University                            | (401) 863-1000       | www.brown.edu              | 4-year, Private not-for-       |
| Bucknell University                         | (570) 577-2000       | www.bucknell.edu           | 4-year, Private not-for-       |
| California Institute of Technology          | (626) 395-6811       | www.caltech.edu            | 4-year, Private not-for-       |
| Carleton College                            | (507) 222-4000       | www.carleton.edu           | 4-year, Private not-for-       |
| Carnegie Mellon University                  | (412) 268-2000       | www.cmu.edu/               | 4-year, Private not-for-       |
| Carthage College                            | (262) 551-8500       | www.carthage.edu           | 4-year, Private not-for-       |
| Cedar Crest College                         | (610) 606-4666 x3329 | www.cedarcrest.edu         | 4-year, Private not-for-profit |
| Centenary College of Louisiana              | (318) 869-5011       | www.centenary.edu          | 4-year, Private not-for-       |
| Central Michigan University                 | (989) 774-4000       | www.cmich.edu              | 4-year, Public                 |
| Claremont McKenna College                   | (909) 621-8000       | www.claremontmckenna.edu/  | 4-year, Private not-for-       |
| Coe College                                 | (319) 399-8000       | www.coe.edu                | 4-year, Private not-for-       |
| Colby College                               | (207) 859-4000       | www.colby.edu              | 4-year, Private not-for-       |
| Colgate University                          | (315) 228-1000       | www.colgate.edu            | 4-year, Private not-for-       |
| Colorado College                            | (719) 389-6000       | www.coloradocollege.edu    | 4-year, Private not-for-       |
| Columbia University in the City of New York | (212) 854-1754       | www.columbia.edu           | 4-year, Private not-for-       |
| Connecticut College                         | (860) 447-1911       | www.connecticutcollege.edu | 4-year, Private not-for-       |
| Dartmouth College                           | (603) 646-1110       | www.dartmouth.edu          | 4-year, Private not-for-       |
| Dickinson College                           | (717) 243-5121       | www.dickinson.edu          | 4-year, Private not-for-       |
| Drake University                            | (515) 271-2011       | www.drake.edu              | 4-year, Private not-for-       |

TABLE 2: PROGRAMS

| <b>Institution Name</b>                     | <b>Awards offered</b>                                                                                                                             |
|---------------------------------------------|---------------------------------------------------------------------------------------------------------------------------------------------------|
| Allegheny College                           | Bachelor's degree                                                                                                                                 |
| Amherst College                             | Bachelor's degree                                                                                                                                 |
| Baldwin-Wallace College                     | Less than one year certificate; Bachelor's degree; Master's degree                                                                                |
| Barnard College                             | Bachelor's degree                                                                                                                                 |
| Bates College                               | Bachelor's degree                                                                                                                                 |
| Baylor University                           | Bachelor's degree; Master's degree; Post-master's certificate                                                                                     |
| Boston University                           | Bachelor's degree; Postbaccalaureate certificate; Master's degree; Post-master's certificate                                                      |
| Bowdoin College                             | Bachelor's degree                                                                                                                                 |
| Bowling Green State University-Main Campus  | Bachelor's degree; Master's degree; Post-master's certificate                                                                                     |
| Brandeis University                         | Bachelor's degree; Postbaccalaureate certificate; Master's degree                                                                                 |
| Brigham Young University                    | Bachelor's degree; Postbaccalaureate certificate; Master's degree                                                                                 |
| Brown University                            | Bachelor's degree; Master's degree                                                                                                                |
| Bucknell University                         | Bachelor's degree; Master's degree                                                                                                                |
| California Institute of Technology          | Bachelor's degree; Master's degree; Post-master's certificate                                                                                     |
| Carleton College                            | Bachelor's degree                                                                                                                                 |
| Carnegie Mellon University                  | Bachelor's degree; Master's degree; Post-master's certificate                                                                                     |
| Carthage College                            | Less than one year certificate; Bachelor's degree; Master's degree                                                                                |
| Cedar Crest College                         | One but less than two years certificate; Two but less than 4 years certificate; Bachelor's degree; Postbaccalaureate certificate; Master's degree |
| Centenary College of Louisiana              | Bachelor's degree; Master's degree                                                                                                                |
| Central Michigan University                 | Bachelor's degree; Postbaccalaureate certificate; Master's degree; Post-master's certificate                                                      |
| Claremont McKenna College                   | Bachelor's degree; Master's degree                                                                                                                |
| Coe College                                 | Bachelor's degree; Master's degree                                                                                                                |
| Colby College                               | Bachelor's degree                                                                                                                                 |
| Colgate University                          | Bachelor's degree; Master's degree                                                                                                                |
| Colorado College                            | Bachelor's degree; Master's degree                                                                                                                |
| Columbia University in the City of New York | Bachelor's degree; Postbaccalaureate certificate; Master's degree; Post-master's certificate                                                      |
| Connecticut College                         | Bachelor's degree; Master's degree                                                                                                                |
| Dartmouth College                           | Bachelor's degree; Master's degree                                                                                                                |
| Dickinson College                           | Bachelor's degree                                                                                                                                 |
| Drake University                            | Bachelor's degree; Master's degree; Post-master's certificate                                                                                     |

TABLE 2: PROGRAMS

Ramos et al. Supplementary Material  
JUNE, Spring 2011, 9(2)

| Institution Name                            | Campus setting  | Campus housing | Student population | Undergraduate students | Student-to-faculty ratio |
|---------------------------------------------|-----------------|----------------|--------------------|------------------------|--------------------------|
| Allegheny College                           | Town: Distant   | Yes            | 2132               | 2132                   | 12 to 1                  |
| Amherst College                             | Town: Fringe    | Yes            | 1744               | 1744                   | 8 to 1                   |
| Baldwin-Wallace College                     | Suburb: Large   | Yes            | 4388               | 3675                   | 15 to 1                  |
| Barnard College                             | City: Large     | Yes            | 2357               | 2357                   | 9 to 1                   |
| Bates College                               | City: Small     | Yes            | 1738               | 1738                   | 10 to 1                  |
| Baylor University                           | City: Midsize   | Yes            | 14614              | 12149                  | 15 to 1                  |
| Boston University                           | City: Large     | Yes            | 31960              | 18283                  | 13 to 1                  |
| Bowdoin College                             | Town: Distant   | Yes            | 1777               | 1777                   | 9 to 1                   |
| Bowling Green State University-Main Campus  | Town: Distant   | Yes            | 17309              | 14319                  | 17 to 1                  |
| Brandeis University                         | City: Small     | Yes            | 5598               | 3317                   | 9 to 1                   |
| Brigham Young University                    | City: Midsize   | Yes            | 34130              | 30745                  | 23 to 1                  |
| Brown University                            | City: Midsize   | Yes            | 8574               | 6244                   | 9 to 1                   |
| Bucknell University                         | Town: Distant   | Yes            | 3737               | 3607                   | 10 to 1                  |
| California Institute of Technology          | City: Midsize   | Yes            | 2130               | 951                    | 3 to 1                   |
| Carleton College                            | Town: Distant   | Yes            | 2009               | 2009                   | 9 to 1                   |
| Carnegie Mellon University                  | City: Large     | Yes            | 11197              | 5777                   | 11 to 1                  |
| Carthage College                            | Suburb: Midsize | Yes            | 3121               | 3031                   | 14 to 1                  |
| Cedar Crest College                         | City: Midsize   | Yes            | 1887               | 1685                   | 11 to 1                  |
| Centenary College of Louisiana              | City: Midsize   | Yes            | 974                | 887                    | 11 to 1                  |
| Central Michigan University                 | Town: Distant   | Yes            | 27247              | 20581                  | 21 to 1                  |
| Claremont McKenna College                   | Suburb: Large   | Yes            | 1238               | 1218                   | 9 to 1                   |
| Coe College                                 | City: Midsize   | Yes            | 1300               | 1287                   | 11 to 1                  |
| Colby College                               | Town: Remote    | Yes            | 1838               | 1838                   | 10 to 1                  |
| Colgate University                          | Town: Distant   | Yes            | 2837               | 2825                   | 10 to 1                  |
| Colorado College                            | City: Large     | Yes            | 2032               | 2000                   | 10 to 1                  |
| Columbia University in the City of New York | City: Large     | Yes            | 24230              | 7743                   | 6 to 1                   |
| Connecticut College                         | City: Small     | Yes            | 1911               | 1906                   | 9 to 1                   |
| Dartmouth College                           | Town: Remote    | Yes            | 5987               | 4196                   | 8 to 1                   |
| Dickinson College                           | Town: Distant   | Yes            | 2376               | 2376                   | 10 to 1                  |
| Drake University                            | City: Midsize   | Yes            | 5653               | 3548                   | 13 to 1                  |

TABLE 2: PROGRAMS

| <b>Institution Name</b>                     | <b>IPEDS ID</b> | <b>OPE ID</b> |
|---------------------------------------------|-----------------|---------------|
| Allegheny College                           | 210669          | 00323000      |
| Amherst College                             | 164465          | 00211500      |
| Baldwin-Wallace College                     | 201195          | 00301400      |
| Barnard College                             | 189097          | 00270800      |
| Bates College                               | 160977          | 00203600      |
| Baylor University                           | 223232          | 00354500      |
| Boston University                           | 164988          | 00213000      |
| Bowdoin College                             | 161004          | 00203800      |
| Bowling Green State University-Main Campus  | 201441          | 00301800      |
| Brandeis University                         | 165015          | 00213300      |
| Brigham Young University                    | 230038          | 00367000      |
| Brown University                            | 217156          | 00340100      |
| Bucknell University                         | 211291          | 00323800      |
| California Institute of Technology          | 110404          | 00113100      |
| Carleton College                            | 173258          | 00234000      |
| Carnegie Mellon University                  | 211440          | 00324200      |
| Carthage College                            | 238476          | 00383900      |
| Cedar Crest College                         | 211468          | 00324300      |
| Centenary College of Louisiana              | 158477          | 00200300      |
| Central Michigan University                 | 169248          | 00224300      |
| Claremont McKenna College                   | 112260          | 00117000      |
| Coe College                                 | 153144          | 00185400      |
| Colby College                               | 161086          | 00203900      |
| Colgate University                          | 190099          | 00270100      |
| Colorado College                            | 126678          | 00134700      |
| Columbia University in the City of New York | 190150          | 00270700      |
| Connecticut College                         | 128902          | 00137900      |
| Dartmouth College                           | 182670          | 00257300      |
| Dickinson College                           | 212009          | 00325300      |
| Drake University                            | 153269          | 00186000      |

TABLE 2: PROGRAMS

| Program Name                  | Institution Name                                   | Address                                                               |
|-------------------------------|----------------------------------------------------|-----------------------------------------------------------------------|
| Neuroscience                  | Drew University                                    | 36 Madison Ave, Madison, New Jersey 07940                             |
| Neuroscience                  | Eastern University                                 | 1300 Eagle Rd, Saint Davids, Pennsylvania 19087-3696                  |
| Neuroscience                  | Emmanuel College                                   | 400 The Fenway, Boston, Massachusetts 02115                           |
| Neuroscience                  | Emory University                                   | 408 Administration Building, 201 Dowman Drive, Atlanta, Georgia 30322 |
| Neuroscience                  | Fairfield University                               | 1073 N Benson Rd, Fairfield, Connecticut 06824-5195                   |
| Neuroscience                  | Franklin and Marshall College                      | College Ave, Lancaster, Pennsylvania 17604-3003                       |
| Neuroscience                  | Furman University                                  | 3300 Poinsett Highway, Greenville, South Carolina 29613-6162          |
| Neuroscience                  | George Mason University                            | 4400 University Dr, Fairfax, Virginia 22030-4444                      |
| Neurobio/Neurophys            | Georgetown University                              | 37th and O St NW, Washington, District of Columbia 20057              |
| Neuroscience                  | Hamilton College                                   | 198 College Hill Rd, Clinton, New York 13323                          |
| Neurobio/Neurophys            | Hampshire College                                  | 893 West St, Amherst, Massachusetts 01002-5001                        |
| Neurobio/Neurophys            | Harvard University                                 | Massachusetts Hall, Cambridge, Massachusetts 02138                    |
| Neuroscience                  | Hiram College                                      | Hinsdale Hall Third Floor, Hiram, Ohio 44234-0067                     |
| Neuroscience                  | Indiana University-Bloomington                     | 107 South Indiana Ave., Bloomington, Indiana 47405-7000               |
| Neuroscience                  | Johns Hopkins University                           | 3400 N Charles St, Mason Hall, Baltimore, Maryland 21218-2688         |
| Neuroscience                  | Kenyon College                                     | Gambier, Ohio 43022                                                   |
| Neuroscience                  | King College                                       | 1350 King College Rd, Bristol, Tennessee 37620-2699                   |
| Neuroscience                  | King's College                                     | 133 N River St, Wilkes Barre, Pennsylvania 18711-0801                 |
| Neuroscience                  | Knox College                                       | 2 E South St, Galesburg, Illinois 61401-9999                          |
| Neuroscience                  | Lafayette College                                  | High St, Easton, Pennsylvania 18042-1768                              |
| Neuroscience                  | Lehigh University                                  | 27 Memorial Drive West, Bethlehem, Pennsylvania 18015                 |
| Neuroscience                  | Macalester College                                 | 1600 Grand Ave, Saint Paul, Minnesota 55105-1899                      |
| Neuroscience                  | Massachusetts Institute of Technology              | 77 Massachusetts Avenue, Cambridge, Massachusetts 02139-4307          |
| Neuroscience                  | Middlebury College                                 | Old Chapel, Middlebury, Vermont 05753                                 |
| Neuroscience                  | Moravian College and Moravian Theological Seminary | 1200 Main St, Bethlehem, Pennsylvania 18018-6650                      |
| Neuroscience                  | Mount Holyoke College                              | 50 College Street, South Hadley, Massachusetts 01075-1489             |
| Neuroscience                  | Mount Union College                                | 1972 Clark Ave., Alliance, Ohio 44601-3993                            |
| Neuroscience                  | Muhlenberg College                                 | 2400 Chew Street, Allentown, Pennsylvania 18104                       |
| Neurosci & Neurobio/Neurophys | Muskingum University                               | 163 Stormont Street, New Concord, Ohio 43762                          |

TABLE 2: PROGRAMS

| Institution Name                                   | Phone          | Homepage             | Type                     |
|----------------------------------------------------|----------------|----------------------|--------------------------|
| Drew University                                    | (973) 408-3000 | www.drew.edu         | 4-year, Private not-for- |
| Eastern University                                 | (610) 341-5800 | www.eastern.edu      | 4-year, Private not-for- |
| Emmanuel College                                   | (617) 735-9715 | www.emmanuel.edu     | 4-year, Private not-for- |
| Emory University                                   | (404) 727-6123 | www.emory.edu        | 4-year, Private not-for- |
| Fairfield University                               | (203) 254-4000 | www.fairfield.edu    | 4-year, Private not-for- |
| Franklin and Marshall College                      | (717) 291-3911 | WWW.FANDM.EDU        | 4-year, Private not-for- |
| Furman University                                  | (864) 294-2000 | www.furman.edu       | 4-year, Private not-for- |
| George Mason University                            | (703) 993-1000 | www.gmu.edu          | 4-year, Public           |
| Georgetown University                              | (202) 687-0100 | www.georgetown.edu   | 4-year, Private not-for- |
| Hamilton College                                   | (315) 859-4011 | www.hamilton.edu     | 4-year, Private not-for- |
| Hampshire College                                  | (413) 549-4600 | www.hampshire.edu    | 4-year, Private not-for- |
| Harvard University                                 | (617) 495-1000 | www.harvard.edu/     | 4-year, Private not-for- |
| Hiram College                                      | (330) 569-3211 | WWW.HIRAM.EDU        | 4-year, Private not-for- |
| Indiana University-Bloomington                     | (812) 855-4848 | www.iub.edu          | 4-year, Public           |
|                                                    |                |                      | 4-year, Private not-for- |
| Johns Hopkins University                           | (410) 516-8000 | www.jhu.edu          | profit                   |
| Kenyon College                                     | (740) 427-5000 | www.kenyon.edu/      | 4-year, Private not-for- |
| King College                                       | (423) 968-1187 | www.king.edu         | 4-year, Private not-for- |
| King's College                                     | (570) 208-5900 | www.kings.edu        | 4-year, Private not-for- |
| Knox College                                       | (309) 341-7000 | www.knox.edu         | 4-year, Private not-for- |
| Lafayette College                                  | (610) 330-5000 | www.lafayette.edu    | 4-year, Private not-for- |
| Lehigh University                                  | (610) 758-3000 | www.lehigh.edu       | 4-year, Private not-for- |
| Macalester College                                 | (651) 696-6000 | www.macalester.edu   | 4-year, Private not-for- |
| Massachusetts Institute of Technology              | (617) 253-1000 | web.mit.edu/student/ | 4-year, Private not-for- |
| Middlebury College                                 | (802) 443-5000 | www.middlebury.edu   | 4-year, Private not-for- |
| Moravian College and Moravian Theological Seminary | (610) 861-1360 | www.moravian.edu     | 4-year, Private not-for- |
| Mount Holyoke College                              | (413) 538-2000 | www.mtholyoke.edu    | 4-year, Private not-for- |
| Mount Union College                                | (800) 992-6682 | www.muc.edu          | 4-year, Private not-for- |
|                                                    |                |                      | 4-year, Private not-for- |
| Muhlenberg College                                 | (484) 664-3100 | www.muhlenberg.edu   | profit                   |
| Muskingum University                               | (740) 826-8211 | www.muskingum.edu/   | 4-year, Private not-for- |

TABLE 2: PROGRAMS

| <b>Institution Name</b>                            | <b>Awards offered</b>                                                                                                                             |
|----------------------------------------------------|---------------------------------------------------------------------------------------------------------------------------------------------------|
| Drew University                                    | Bachelor's degree;Postbaccalaureate certificate;Master's degree;Post-master's certificate                                                         |
| Eastern University                                 | Associate's degree;Bachelor's degree;Postbaccalaureate certificate;Master's degree                                                                |
| Emmanuel College                                   | Bachelor's degree;Postbaccalaureate certificate;Master's degree;Post-master's certificate                                                         |
| Emory University                                   | Associate's degree;Bachelor's degree;Postbaccalaureate certificate;Master's degree;Post-master's certificate                                      |
| Fairfield University                               | Associate's degree;Bachelor's degree;Postbaccalaureate certificate;Master's degree;Post-master's certificate                                      |
| Franklin and Marshall College                      | Bachelor's degree                                                                                                                                 |
| Furman University                                  | Bachelor's degree;Postbaccalaureate certificate;Master's degree                                                                                   |
| George Mason University                            | Bachelor's degree;Postbaccalaureate certificate;Master's degree;Post-master's certificate                                                         |
| Georgetown University                              | One but less than two years certificate;Bachelor's degree;Master's degree                                                                         |
| Hamilton College                                   | Bachelor's degree                                                                                                                                 |
| Hampshire College                                  | Bachelor's degree                                                                                                                                 |
| Harvard University                                 | Associate's degree;Bachelor's degree;Postbaccalaureate certificate;Master's degree;Post-master's certificate                                      |
| Hiram College                                      | Bachelor's degree;Master's degree                                                                                                                 |
| Indiana University-Bloomington                     | One but less than two years certificate;Associate's degree;Bachelor's degree;Master's degree;Post-master's certificate                            |
| Johns Hopkins University                           | Two but less than 4 years certificate;Bachelor's degree;Postbaccalaureate certificate;Master's degree;Post-master's certificate                   |
| Kenyon College                                     | Bachelor's degree                                                                                                                                 |
| King College                                       | Bachelor's degree;Postbaccalaureate certificate;Master's degree                                                                                   |
| King's College                                     | Less than one year certificate;Associate's degree;Bachelor's degree;Postbaccalaureate certificate;Master's degree                                 |
| Knox College                                       | Bachelor's degree                                                                                                                                 |
| Lafayette College                                  | Bachelor's degree                                                                                                                                 |
| Lehigh University                                  | Bachelor's degree;Master's degree;Post-master's certificate                                                                                       |
| Macalester College                                 | Bachelor's degree                                                                                                                                 |
| Massachusetts Institute of Technology              | Bachelor's degree;Master's degree                                                                                                                 |
| Middlebury College                                 | Bachelor's degree;Master's degree                                                                                                                 |
| Moravian College and Moravian Theological Seminary | Bachelor's degree;Postbaccalaureate certificate;Master's degree                                                                                   |
| Mount Holyoke College                              | Bachelor's degree;Postbaccalaureate certificate;Master's degree                                                                                   |
| Mount Union College                                | Bachelor's degree;Master's degree                                                                                                                 |
| Muhlenberg College                                 | Less than one year certificate;One but less than two years certificate;Associate's degree;Two but less than 4 years certificate;Bachelor's degree |
| Muskingum University                               | Bachelor's degree;Master's degree                                                                                                                 |



TABLE 2: PROGRAMS

Ramos et al. Supplementary Material  
JUNE, Spring 2011, 9(2)

| <b>Institution Name</b>                            | <b>Campus setting</b> | <b>Campus housing</b> | <b>Student population</b> | <b>Undergraduate students</b> | <b>Student-to-faculty ratio</b> |
|----------------------------------------------------|-----------------------|-----------------------|---------------------------|-------------------------------|---------------------------------|
| Drew University                                    | Suburb: Large         | Yes                   | 2667                      | 1739                          | 11 to 1                         |
| Eastern University                                 | Suburb: Large         | Yes                   | 4331                      | 2713                          | 13 to 1                         |
| Emmanuel College                                   | City: Large           | Yes                   | 2454                      | 2175                          | 16 to 1                         |
| Emory University                                   | Suburb: Large         | Yes                   | 12930                     | 6980                          | 7 to 1                          |
| Fairfield University                               | Suburb: Large         | Yes                   | 5074                      | 3886                          | 12 to 1                         |
| Franklin and Marshall College                      | Suburb: Large         | Yes                   | 2175                      | 2175                          | 10 to 1                         |
| Furman University                                  | Suburb: Large         | Yes                   | 2962                      | 2753                          | 11 to 1                         |
| George Mason University                            | Suburb: Large         | Yes                   | 32067                     | 19702                         | 16 to 1                         |
| Georgetown University                              | City: Large           | Yes                   | 16520                     | 7461                          | 10 to 1                         |
| Hamilton College                                   | Suburb: Midsize       | Yes                   | 1882                      | 1882                          | 9 to 1                          |
| Hampshire College                                  | Town: Fringe          | Yes                   | 1463                      | 1463                          | 12 to 1                         |
| Harvard University                                 | City: Midsize         | Yes                   | 27651                     | 10257                         | 7 to 1                          |
| Hiram College                                      | Rural: Distant        | Yes                   | 1395                      | 1367                          | 12 to 1                         |
| Indiana University-Bloomington                     | City: Small           | Yes                   | 42347                     | 32490                         | 19 to 1                         |
| Johns Hopkins University                           | City: Large           | Yes                   | 20383                     | 5831                          | 11 to 1                         |
| Kenyon College                                     | Rural: Fringe         | Yes                   | 1633                      | 1633                          | 10 to 1                         |
| King College                                       | City: Small           | Yes                   | 1804                      | 1519                          | 14 to 1                         |
| King's College                                     | City: Small           | Yes                   | 2645                      | 2296                          | 13 to 1                         |
| Knox College                                       | Town: Distant         | Yes                   | 1407                      | 1407                          | 12 to 1                         |
| Lafayette College                                  | Suburb: Large         | Yes                   | 2406                      | 2406                          | 11 to 1                         |
| Lehigh University                                  | City: Small           | Yes                   | 6996                      | 4809                          | 10 to 1                         |
| Macalester College                                 | City: Large           | Yes                   | 1996                      | 1996                          | 11 to 1                         |
| Massachusetts Institute of Technology              | City: Midsize         | Yes                   | 10384                     | 4232                          | 8 to 1                          |
| Middlebury College                                 | Rural: Fringe         | Yes                   | 2482                      | 2482                          | 9 to 1                          |
| Moravian College and Moravian Theological Seminary | City: Small           | Yes                   | 2057                      | 1795                          | 10 to 1                         |
| Mount Holyoke College                              | Suburb: Large         | Yes                   | 2304                      | 2288                          | 9 to 1                          |
| Mount Union College                                | Town: Distant         | Yes                   | 2212                      | 2193                          | 14 to 1                         |
| Muhlenberg College                                 | City: Midsize         | Yes                   | 2517                      | 2517                          | 12 to 1                         |
| Muskingum University                               | Town: Distant         | Yes                   | 2207                      | 1725                          | 14 to 1                         |

TABLE 2: PROGRAMS

| <b>Institution Name</b>                            | <b>IPEDS ID</b> | <b>OPE ID</b> |
|----------------------------------------------------|-----------------|---------------|
| Drew University                                    | 184348          | 00260300      |
| Eastern University                                 | 212133          | 00325900      |
| Emmanuel College                                   | 165671          | 00214700      |
| Emory University                                   | 139658          | 00156400      |
| Fairfield University                               | 129242          | 00138500      |
| Franklin and Marshall College                      | 212577          | 00326500      |
| Furman University                                  | 218070          | 00343400      |
| George Mason University                            | 232186          | 00374900      |
| Georgetown University                              | 131496          | 00144500      |
| Hamilton College                                   | 191515          | 00272800      |
| Hampshire College                                  | 166018          | 00466100      |
| Harvard University                                 | 166027          | 00215500      |
| Hiram College                                      | 203128          | 00304900      |
| Indiana University-Bloomington                     | 151351          | 00180900      |
|                                                    |                 |               |
| Johns Hopkins University                           | 162928          | 00207700      |
| Kenyon College                                     | 203535          | 00306500      |
| King College                                       | 220516          | 00349600      |
| King's College                                     | 213321          | 00328200      |
| Knox College                                       | 146427          | 00170400      |
| Lafayette College                                  | 213385          | 00328400      |
| Lehigh University                                  | 213543          | 00328900      |
| Macalester College                                 | 173902          | 00235800      |
| Massachusetts Institute of Technology              | 166683          | 00217800      |
| Middlebury College                                 | 230959          | 00369100      |
| Moravian College and Moravian Theological Seminary | 214157          | 00330100      |
| Mount Holyoke College                              | 166939          | 00219200      |
| Mount Union College                                | 204185          | 00308300      |
|                                                    |                 |               |
| Muhlenberg College                                 | 214175          | 00330400      |
| Muskingum University                               | 204264          | 00308400      |

TABLE 2: PROGRAMS

| Program Name       | Institution Name                     | Address                                                      |
|--------------------|--------------------------------------|--------------------------------------------------------------|
| Neuroscience       | New York University                  | 70 Washington Sq South, New York, New York 10012-1091        |
| Neuroscience       | Northeastern University              | 360 Huntington Ave, Boston, Massachusetts 02115-5000         |
| Neuroscience       | Northwestern University              | 633 Clark St, Evanston, Illinois 60208                       |
| Neuroscience       | Oberlin College                      | 70 N Professor St, Oberlin, Ohio 44074                       |
| Neuroscience       | Ohio Wesleyan University             | 61 S Sandusky Street, Delaware, Ohio 43015-2370              |
| Neuroscience       | Pitzer College                       | 1050 North Mills Avenue, Claremont, California 91711-6101    |
| Neuroscience       | Pomona College                       | 550 N College Ave, Claremont, California 91711-6319          |
| Neuroscience       | Regis University                     | 3333 Regis Blvd, Denver, Colorado 80221-1099                 |
| Neuroscience       | Rhodes College                       | 2000 North Parkway, Memphis, Tennessee 38112-1690            |
| Neuroscience       | Saint Ambrose University             | 518 W Locust St, Davenport, Iowa 52803-2898                  |
| Neuroscience       | Scripps College                      | 1030 North Columbia Avenue, Claremont, California 91711-3905 |
| Neuroscience       | Skidmore College                     | 815 N Broadway, Saratoga Springs, New York 12866             |
| Neuroscience       | Smith College                        | Elm St, Northampton, Massachusetts 01063                     |
| Neuroscience       | St Lawrence University               | 23 Romoda Drive, Canton, New York 13617                      |
| Neuroscience       | Stonehill College                    | 320 Washington Street, Easton, Massachusetts 02357-6110      |
| Neuroscience       | Texas Christian University           | 2800 S University Dr, Fort Worth, Texas 76129                |
| Neuroscience       | The College of Wooster               | 1189 Beall Avenue, Wooster, Ohio 44691                       |
| Neuroscience       | The University of Texas at Dallas    | 800 West Campbell Road, Richardson, Texas 75080-3021         |
| Neuroscience       | Thiel College                        | 75 College Ave, Greenville, Pennsylvania 16125-2181          |
| Neuroscience       | Trinity College                      | 300 Summit St, Hartford, Connecticut 06106-3100              |
| Neuroscience       | Trinity University                   | One Trinity Place, San Antonio, Texas 78212-7200             |
| Neuroscience       | Tulane University of Louisiana       | 6823 Saint Charles Ave, New Orleans, Louisiana 70118-5698    |
| Neuroscience       | Union College                        | 807 Union St, Schenectady, New York 12308-2311               |
| Neurobio/Neurophys | University of California-Davis       | One Shields Avenue, Davis, California 95616-8678             |
| Neuroscience       | University of California-Irvine      | Irvine, California 92697                                     |
| Neuroscience       | University of California-Los Angeles | 405 Hilgard Ave, Los Angeles, California 90095-1405          |
| Neuroscience       | University of California-Riverside   | 900 University Ave, Riverside, California 92521              |
| Neurobio/Neurophys | University of California-San Diego   | 9500 Gilman Dr, La Jolla, California 92093                   |

TABLE 2: PROGRAMS

| Institution Name                     | Phone                | Homepage               | Type                           |
|--------------------------------------|----------------------|------------------------|--------------------------------|
| New York University                  | (212) 998-1212       | www.nyu.edu            | 4-year, Private not-for-profit |
| Northeastern University              | (617) 373-2000       | www.northeastern.edu   | 4-year, Private not-for-profit |
| Northwestern University              | (847) 491-3741       | www.northwestern.edu   | 4-year, Private not-for-profit |
| Oberlin College                      | (440) 775-8411       | www.oberlin.edu        | 4-year, Private not-for-profit |
| Ohio Wesleyan University             | (740) 368-2000       | www.owu.edu/           | 4-year, Private not-for-profit |
| Pitzer College                       | (909) 621-8000       | www.pitzer.edu         | 4-year, Private not-for-profit |
| Pomona College                       | (909) 621-8131       | www.pomona.edu         | 4-year, Private not-for-profit |
| Regis University                     | (800) 388-2366 x2111 | www.regis.edu/         | 4-year, Private not-for-profit |
| Rhodes College                       | (901) 843-3000       | www.rhodes.edu         | 4-year, Private not-for-profit |
| Saint Ambrose University             | (563) 333-6000       | www.sau.edu            | 4-year, Private not-for-profit |
| Scripps College                      | (909) 621-8149       | www.scrippscollege.edu | 4-year, Private not-for-profit |
| Skidmore College                     | (518) 580-5000       | www.skidmore.edu       | 4-year, Private not-for-profit |
| Smith College                        | (413) 584-2700       | www.smith.edu          | 4-year, Private not-for-profit |
| St Lawrence University               | (315) 229-5011       | www.stlawu.edu         | 4-year, Private not-for-profit |
| Stonehill College                    | (508) 565-1000       | www.stonehill.edu      | 4-year, Private not-for-profit |
| Texas Christian University           | (817) 257-7000       | tcu.edu                | 4-year, Private not-for-profit |
| The College of Wooster               | (330) 263-2000       | www.wooster.edu        | 4-year, Private not-for-profit |
| The University of Texas at Dallas    | (972) 883-2111       | www.utdallas.edu       | 4-year, Public                 |
| Thiel College                        | (724) 589-2000       | www.thiel.edu          | 4-year, Private not-for-profit |
| Trinity College                      | (860) 297-2000       | www.Trincoll.edu       | 4-year, Private not-for-profit |
| Trinity University                   | (210) 999-7011       | www.trinity.edu        | 4-year, Private not-for-profit |
| Tulane University of Louisiana       | (504) 865-5000       | www.tulane.edu         | 4-year, Private not-for-profit |
| Union College                        | (518) 388-6000       | www.union.edu/         | 4-year, Private not-for-profit |
| University of California-Davis       | (530) 752-1011       | www.ucdavis.edu        | 4-year, Public                 |
| University of California-Irvine      | (949) 824-5011       | www.uci.edu/           | 4-year, Public                 |
| University of California-Los Angeles | (310) 825-4321       | www.ucla.edu/          | 4-year, Public                 |
| University of California-Riverside   | (951) 827-1012       | WWW.UCR.EDU            | 4-year, Public                 |
| University of California-San Diego   | (858) 534-2230       | www.ucsd.edu           | 4-year, Public                 |

TABLE 2: PROGRAMS

| <b>Institution Name</b>              | <b>Awards offered</b>                                                                                                                                                                      |
|--------------------------------------|--------------------------------------------------------------------------------------------------------------------------------------------------------------------------------------------|
| New York University                  | Less than one year certificate;Associate's degree;Bachelor's degree;Master's degree;Post-master's certificate                                                                              |
| Northeastern University              | One but less than two years certificate;Associate's degree;Two but less than 4 years certificate;Bachelor's degree;Postbaccalaureate certificate;Master's degree;Post-master's certificate |
| Northwestern University              | One but less than two years certificate;Bachelor's degree;Master's degree;Post-master's certificate                                                                                        |
| Oberlin College                      | Two but less than 4 years certificate;Bachelor's degree;Postbaccalaureate certificate;Master's degree                                                                                      |
| Ohio Wesleyan University             | Bachelor's degree                                                                                                                                                                          |
| Pitzer College                       | Bachelor's degree                                                                                                                                                                          |
| Pomona College                       | Bachelor's degree                                                                                                                                                                          |
| Regis University                     | Less than one year certificate;Bachelor's degree;Postbaccalaureate certificate;Master's degree;Post-master's certificate                                                                   |
| Rhodes College                       | Bachelor's degree;Master's degree                                                                                                                                                          |
| Saint Ambrose University             | Less than one year certificate;One but less than two years certificate;Bachelor's degree;Postbaccalaureate certificate;Master's degree;Post-master's certificate                           |
| Scripps College                      | Two but less than 4 years certificate;Bachelor's degree;Postbaccalaureate certificate                                                                                                      |
| Skidmore College                     | Bachelor's degree;Master's degree                                                                                                                                                          |
| Smith College                        | Bachelor's degree;Postbaccalaureate certificate;Master's degree;Post-master's certificate                                                                                                  |
| St Lawrence University               | Bachelor's degree;Master's degree;Post-master's certificate                                                                                                                                |
| Stonehill College                    | Bachelor's degree                                                                                                                                                                          |
| Texas Christian University           | Less than one year certificate;One but less than two years certificate;Two but less than 4 years certificate;Bachelor's degree;Master's degree                                             |
| The College of Wooster               | Bachelor's degree                                                                                                                                                                          |
| The University of Texas at Dallas    | Bachelor's degree;Postbaccalaureate certificate;Master's degree                                                                                                                            |
| Thiel College                        | Associate's degree;Bachelor's degree                                                                                                                                                       |
| Trinity College                      | Bachelor's degree;Master's degree                                                                                                                                                          |
| Trinity University                   | Bachelor's degree;Master's degree                                                                                                                                                          |
| Tulane University of Louisiana       | Associate's degree;Bachelor's degree;Postbaccalaureate certificate;Master's degree                                                                                                         |
| Union College                        | Bachelor's degree                                                                                                                                                                          |
| University of California-Davis       | Bachelor's degree;Postbaccalaureate certificate;Master's degree;Post-master's certificate                                                                                                  |
| University of California-Irvine      | Bachelor's degree;Postbaccalaureate certificate;Master's degree                                                                                                                            |
| University of California-Los Angeles | Bachelor's degree;Master's degree                                                                                                                                                          |
| University of California-Riverside   | Bachelor's degree;Master's degree                                                                                                                                                          |
| University of California-San Diego   | Bachelor's degree;Master's degree                                                                                                                                                          |

TABLE 2: PROGRAMS

Ramos et al. Supplementary Material  
JUNE, Spring 2011, 9(2)

| Institution Name                     | Campus setting  | Campus housing | Student population | Undergraduate students | Student-to-faculty ratio |
|--------------------------------------|-----------------|----------------|--------------------|------------------------|--------------------------|
| New York University                  | City: Large     | Yes            | 43404              | 21638                  | 11 to 1                  |
| Northeastern University              | City: Large     | Yes            | 27537              | 18782                  | 15 to 1                  |
| Northwestern University              | City: Small     | Yes            | 19853              | 9555                   | 7 to 1                   |
| Oberlin College                      | Suburb: Midsize | Yes            | 2939               | 2905                   | 9 to 1                   |
| Ohio Wesleyan University             | Town: Distant   | Yes            | 1893               | 1893                   | 11 to 1                  |
| Pitzer College                       | Suburb: Large   | Yes            | 1043               | 1043                   | 11 to 1                  |
| Pomona College                       | Suburb: Large   | Yes            | 1550               | 1550                   | 7 to 1                   |
| Regis University                     | City: Large     | Yes            | 10874              | 5586                   | 8 to 1                   |
| Rhodes College                       | City: Large     | Yes            | 1673               | 1663                   | 10 to 1                  |
| Saint Ambrose University             | City: Midsize   | Yes            | 3729               | 2887                   | 11 to 1                  |
| Scripps College                      | Suburb: Large   | Yes            | 921                | 906                    | 9 to 1                   |
| Skidmore College                     | Suburb: Small   | Yes            | 2727               | 2674                   | 9 to 1                   |
| Smith College                        | Suburb: Large   | Yes            | 3121               | 2614                   | 9 to 1                   |
| St Lawrence University               | Town: Remote    | Yes            | 2401               | 2295                   | 11 to 1                  |
| Stonehill College                    | Suburb: Large   | Yes            | 2468               | 2468                   | 13 to 1                  |
| Texas Christian University           | City: Large     | Yes            | 8853               | 7640                   | 13 to 1                  |
| The College of Wooster               | Town: Distant   | Yes            | 1853               | 1853                   | 11 to 1                  |
| The University of Texas at Dallas    | City: Midsize   | Yes            | 15783              | 9801                   | 20 to 1                  |
| Thiel College                        | Town: Distant   | Yes            | 999                | 999                    | 13 to 1                  |
| Trinity College                      | City: Midsize   | Yes            | 2438               | 2292                   | 9 to 1                   |
| Trinity University                   | City: Large     | Yes            | 2693               | 2487                   | 9 to 1                   |
| Tulane University of Louisiana       | City: Large     | Yes            | 11464              | 7160                   | 8 to 1                   |
| Union College                        | City: Small     | Yes            | 2194               | 2194                   | 10 to 1                  |
| University of California-Davis       | Suburb: Small   | Yes            | 31247              | 24626                  | 16 to 1                  |
| University of California-Irvine      | City: Midsize   | Yes            | 27142              | 22226                  | 19 to 1                  |
| University of California-Los Angeles | City: Large     | Yes            | 38550              | 26687                  | 17 to 1                  |
| University of California-Riverside   | City: Large     | Yes            | 19384              | 16996                  | 19 to 1                  |
| University of California-San Diego   | City: Large     | Yes            | 28418              | 23143                  | 19 to 1                  |

TABLE 2: PROGRAMS

| <b>Institution Name</b>              | <b>IPEDS ID</b> | <b>OPE ID</b> |
|--------------------------------------|-----------------|---------------|
| New York University                  | 193900          | 00278500      |
| Northeastern University              | 167358          | 00219900      |
| Northwestern University              | 147767          | 00173900      |
| Oberlin College                      | 204501          | 00308600      |
| Ohio Wesleyan University             | 204909          | 00310900      |
| Pitzer College                       | 121257          | 00117200      |
| Pomona College                       | 121345          | 00117300      |
| Regis University                     | 127918          | 00136300      |
| Rhodes College                       | 221351          | 00351900      |
| Saint Ambrose University             | 154235          | 00188900      |
| Scripps College                      | 123165          | 00117400      |
| Skidmore College                     | 195526          | 00281400      |
| Smith College                        | 167835          | 00220900      |
| St Lawrence University               | 195216          | 00282900      |
| Stonehill College                    | 167996          | 00221700      |
| Texas Christian University           | 228875          | 00363600      |
| The College of Wooster               | 206589          | 00303700      |
| The University of Texas at Dallas    | 228787          | 00974100      |
| Thiel College                        | 216357          | 00337600      |
| Trinity College                      | 130590          | 00141400      |
| Trinity University                   | 229267          | 00364700      |
| Tulane University of Louisiana       | 160755          | 00202900      |
| Union College                        | 196866          | 00288900      |
| University of California-Davis       | 110644          | 00131300      |
| University of California-Irvine      | 110653          | 00131400      |
| University of California-Los Angeles | 110662          | 00131500      |
| University of California-Riverside   | 110671          | 00131600      |
| University of California-San Diego   | 110680          | 00131700      |

TABLE 2: PROGRAMS

| <b>Program Name</b> | <b>Institution Name</b>                    | <b>Address</b>                                                            |
|---------------------|--------------------------------------------|---------------------------------------------------------------------------|
| Neuroscience        | University of California-Santa Cruz        | 1156 High St, Santa Cruz, California 95064-1011                           |
| Neuroscience        | University of Cincinnati-Main Campus       | 2624 Clifton Avenue, Cincinnati, Ohio 45221-0063                          |
| Neuroscience        | University of Evansville                   | 1800 Lincoln Avenue, Evansville, Indiana 47722                            |
| Neuroscience        | University of Illinois at Chicago          | 601 S Morgan, Chicago, Illinois 60607                                     |
| Neuroscience        | University of Miami                        | University of Miami, Coral Gables, Florida 33124                          |
| Neuroscience        | University of Michigan-Ann Arbor           | Ann Arbor, Michigan 48109                                                 |
| Neuroscience        | University of Minnesota-Twin Cities        | 100 Church Street SE, Minneapolis, Minnesota 55455-0213                   |
| Neuroscience        | University of Nevada-Reno                  | Reno, Nevada 89557                                                        |
| Neuroscience        | University of Pennsylvania                 | 1 College Hall 34th and Spruce Sts, Philadelphia, Pennsylvania 19104-6303 |
| Neuroscience        | University of Pittsburgh-Pittsburgh Campus | 4200 Fifth Avenue, Pittsburgh, Pennsylvania 15260                         |
| Neuroscience        | University of Scranton                     | 800 Linden Street, Scranton, Pennsylvania 18510-4629                      |
| Neuroscience        | University of Southern California          | University Park, Los Angeles, California 90089                            |
| Neuroscience        | University of St Thomas                    | 2115 Summit Ave, Saint Paul, Minnesota 55105-1078                         |
| Neurobio/Neurophys  | University of Washington-Seattle Campus    | 1400 NE Campus Parkway, Seattle, Washington 98195-4550                    |
| Neuroscience        | Ursinus College                            | 601 E. Main St, Collegeville, Pennsylvania 19426-1000                     |
| Neuroscience        | Vanderbilt University                      | 2101 West End Avenue, Nashville, Tennessee 37240                          |
| Neuroscience        | Vassar College                             | 124 Raymond Ave, Poughkeepsie, New York 12604                             |
| Neuroscience        | Washington and Lee University              | 204 West Washington Street, Lexington, Virginia 24450-2116                |
| Neuroscience        | Washington State University                | French Administration Building, Pullman, Washington 99164-1009            |
| Neuroscience        | Washington University in St Louis          | One Brookings Drive, Saint Louis, Missouri 63130-4899                     |
| Neuroscience        | Wellesley College                          | 106 Central St, Wellesley, Massachusetts 02481-8203                       |
| Neuroscience        | Western Washington University              | 516 High St, Bellingham, Washington 98225-9008                            |
| Neuroscience        | Westminster College                        | 1840 South 1300 East, Salt Lake City, Utah 84105                          |



TABLE 2: PROGRAMS

| Institution Name                           | Phone          | Homepage                          | Type                           |
|--------------------------------------------|----------------|-----------------------------------|--------------------------------|
| University of California-Santa Cruz        | (831) 459-0111 | www.ucsc.edu/                     | 4-year, Public                 |
| University of Cincinnati-Main Campus       | (513) 556-6000 | www.uc.edu                        | 4-year, Public                 |
| University of Evansville                   | (812) 488-2000 | www.evansville.edu/               | 4-year, Private not-for-       |
| University of Illinois at Chicago          | (312) 996-7000 | www.uic.edu/index.html/           | 4-year, Public                 |
| University of Miami                        | (305) 284-2211 | www.miami.edu/                    | 4-year, Private not-for-profit |
| University of Michigan-Ann Arbor           | (734) 764-1817 | www.umich.edu                     | 4-year, Public                 |
| University of Minnesota-Twin Cities        | (612) 625-5000 | www1.umn.edu/twincities/index.php | 4-year, Public                 |
| University of Nevada-Reno                  | (775) 784-1110 | www.unr.edu/home/                 | 4-year, Public                 |
| University of Pennsylvania                 | (215) 898-5000 | www.upenn.edu                     | 4-year, Private not-for-profit |
| University of Pittsburgh-Pittsburgh Campus | (412) 624-4141 | www.pitt.edu                      | 4-year, Public                 |
| University of Scranton                     | (570) 941-7400 | www.scranton.edu                  | 4-year, Private not-for-profit |
| University of Southern California          | (213) 740-2311 | www.usc.edu/                      | 4-year, Private not-for-       |
| University of St Thomas                    | (651) 962-5000 | www.stthomas.edu                  | 4-year, Private not-for-profit |
| University of Washington-Seattle Campus    | (206) 543-2100 | www.washington.edu                | 4-year, Public                 |
| Ursinus College                            | (610) 409-3000 | www.ursinus.edu                   | 4-year, Private not-for-       |
| Vanderbilt University                      | (615) 322-7311 | www.vanderbilt.edu                | 4-year, Private not-for-       |
| Vassar College                             | (845) 437-7000 | www.vassar.edu                    | 4-year, Private not-for-       |
| Washington and Lee University              | (540) 458-8400 | www.wlu.edu/                      | 4-year, Private not-for-       |
| Washington State University                | (509) 335-3564 | www.wsu.edu/                      | 4-year, Public                 |
| Washington University in St Louis          | (314) 935-5000 | www.wustl.edu                     | 4-year, Private not-for-profit |
| Wellesley College                          | (781) 283-1000 | www.wellesley.edu                 | 4-year, Private not-for-       |
| Western Washington University              | (360) 650-3000 | www.wwu.edu                       | 4-year, Public                 |
| Westminster College                        | (801) 484-7651 | www.westminstercollege.edu        | 4-year, Private not-for-       |

TABLE 2: PROGRAMS

| <b>Institution Name</b>                    | <b>Awards offered</b>                                                                                                                                                                                                     |
|--------------------------------------------|---------------------------------------------------------------------------------------------------------------------------------------------------------------------------------------------------------------------------|
| University of California-Santa Cruz        | Bachelor's degree;Master's degree                                                                                                                                                                                         |
| University of Cincinnati-Main Campus       | Less than one year certificate;One but less than two years certificate;Associate's degree;Two but less than 4 years certificate;Bachelor's degree;Postbaccalaureate certificate;Master's degree;Post-master's certificate |
| University of Evansville                   | Associate's degree;Bachelor's degree;Master's degree                                                                                                                                                                      |
| University of Illinois at Chicago          | Bachelor's degree;Postbaccalaureate certificate;Master's degree;Post-master's certificate                                                                                                                                 |
| University of Miami                        | Less than one year certificate;One but less than two years certificate;Bachelor's degree;Postbaccalaureate certificate;Master's degree;Post-master's certificate                                                          |
| University of Michigan-Ann Arbor           | Bachelor's degree;Postbaccalaureate certificate;Master's degree;Post-master's certificate                                                                                                                                 |
| University of Minnesota-Twin Cities        | Less than one year certificate;One but less than two years certificate;Two but less than 4 years certificate;Bachelor's degree;Postbaccalaureate certificate;Master's degree;Post-master's certificate                    |
| University of Nevada-Reno                  | Bachelor's degree;Postbaccalaureate certificate;Master's degree;Post-master's certificate                                                                                                                                 |
| University of Pennsylvania                 | Less than one year certificate;One but less than two years certificate;Associate's degree;Two but less than 4 years certificate;Bachelor's degree;Postbaccalaureate certificate;Master's degree;Post-master's certificate |
| University of Pittsburgh-Pittsburgh Campus | Less than one year certificate;One but less than two years certificate;Two but less than 4 years certificate;Bachelor's degree;Postbaccalaureate certificate;Master's degree;Post-master's certificate                    |
| University of Scranton                     | One but less than two years certificate;Associate's degree;Bachelor's degree;Postbaccalaureate certificate;Master's degree;Post-master's certificate                                                                      |
| University of Southern California          | Bachelor's degree;Postbaccalaureate certificate;Master's degree;Post-master's certificate;Other degree                                                                                                                    |
| University of St Thomas                    | Two but less than 4 years certificate;Bachelor's degree;Postbaccalaureate certificate;Master's degree;Post-master's certificate                                                                                           |
| University of Washington-Seattle Campus    | Bachelor's degree;Postbaccalaureate certificate;Master's degree;Post-master's certificate                                                                                                                                 |
| Ursinus College                            | Bachelor's degree                                                                                                                                                                                                         |
| Vanderbilt University                      | Bachelor's degree;Master's degree                                                                                                                                                                                         |
| Vassar College                             | Bachelor's degree;Master's degree                                                                                                                                                                                         |
| Washington and Lee University              | Bachelor's degree;Master's degree                                                                                                                                                                                         |
| Washington State University                | Less than one year certificate;Bachelor's degree;Postbaccalaureate certificate;Master's degree;Post-master's certificate                                                                                                  |
| Washington University in St Louis          | One but less than two years certificate;Associate's degree;Bachelor's degree;Postbaccalaureate certificate;Master's degree;Post-master's certificate                                                                      |
| Wellesley College                          | Bachelor's degree                                                                                                                                                                                                         |
| Western Washington University              | Bachelor's degree;Master's degree                                                                                                                                                                                         |
| Westminster College                        | Bachelor's degree;Postbaccalaureate certificate;Master's degree                                                                                                                                                           |

TABLE 2: PROGRAMS

Ramos et al. Supplementary Material  
JUNE, Spring 2011, 9(2)

| Institution Name                           | Campus setting | Campus housing | Student population | Undergraduate students | Student-to-faculty ratio |
|--------------------------------------------|----------------|----------------|--------------------|------------------------|--------------------------|
| University of California-Santa Cruz        | City: Small    | Yes            | 16775              | 15259                  | 18 to 1                  |
| University of Cincinnati-Main Campus       | City: Large    | Yes            | 31134              | 21884                  | 16 to 1                  |
| University of Evansville                   | City: Midsize  | Yes            | 2840               | 2672                   | 14 to 1                  |
| University of Illinois at Chicago          | City: Large    | Yes            | 26840              | 16044                  | 18 to 1                  |
| University of Miami                        | Suburb: Large  | Yes            | 15629              | 10370                  | 11 to 1                  |
| University of Michigan-Ann Arbor           | City: Midsize  | Yes            | 41674              | 26208                  | 12 to 1                  |
| University of Minnesota-Twin Cities        | City: Large    | Yes            | 51659              | 33236                  | 21 to 1                  |
| University of Nevada-Reno                  | City: Midsize  | Yes            | 16875              | 13340                  | 23 to 1                  |
| University of Pennsylvania                 | City: Large    | Yes            | 24599              | 11954                  | 6 to 1                   |
| University of Pittsburgh-Pittsburgh Campus | City: Large    | Yes            | 28328              | 18031                  | 15 to 1                  |
| University of Scranton                     | City: Small    | Yes            | 5811               | 4154                   | 12 to 1                  |
| University of Southern California          | City: Large    | Yes            | 34824              | 16751                  | 9 to 1                   |
| University of St Thomas                    | City: Large    | Yes            | 10851              | 6146                   | 12 to 1                  |
| University of Washington-Seattle Campus    | City: Large    | Yes            | 45943              | 32718                  | 11 to 1                  |
| Ursinus College                            | Suburb: Large  | Yes            | 1742               | 1742                   | 12 to 1                  |
| Vanderbilt University                      | City: Large    | Yes            | 12506              | 6794                   | 8 to 1                   |
| Vassar College                             | City: Small    | Yes            | 2453               | 2452                   | 8 to 1                   |
| Washington and Lee University              | Town: Distant  | Yes            | 2153               | 1759                   | 7 to 1                   |
| Washington State University                | Town: Distant  | Yes            | 26101              | 21726                  | 15 to 1                  |
| Washington University in St Louis          | Suburb: Large  | Yes            | 13575              | 7046                   | 7 to 1                   |
| Wellesley College                          | Suburb: Large  | Yes            | 2324               | 2324                   | 8 to 1                   |
| Western Washington University              | City: Small    | Yes            | 14575              | 13396                  | 19 to 1                  |
| Westminster College                        | City: Midsize  | Yes            | 3037               | 2172                   | 10 to 1                  |

TABLE 2: PROGRAMS

| <b>Institution Name</b>                    | <b>IPEDS ID</b> | <b>OPE ID</b> |
|--------------------------------------------|-----------------|---------------|
| University of California-Santa Cruz        | 110714          | 00132100      |
| University of Cincinnati-Main Campus       | 201885          | 00312500      |
| University of Evansville                   | 150534          | 00179500      |
| University of Illinois at Chicago          | 145600          | 00177600      |
| University of Miami                        | 135726          | 00153600      |
| University of Michigan-Ann Arbor           | 170976          | 00232500      |
| University of Minnesota-Twin Cities        | 174066          | 00396900      |
| University of Nevada-Reno                  | 182290          | 00256800      |
| University of Pennsylvania                 | 215062          | 00337800      |
| University of Pittsburgh-Pittsburgh Campus | 215293          | 00337900      |
| University of Scranton                     | 215929          | 00338400      |
| University of Southern California          | 123961          | 00132800      |
| University of St Thomas                    | 174914          | 00234500      |
| University of Washington-Seattle Campus    | 236948          | 00379800      |
| Ursinus College                            | 216524          | 00338500      |
| Vanderbilt University                      | 221999          | 00353500      |
| Vassar College                             | 197133          | 00289500      |
| Washington and Lee University              | 234207          | 00376800      |
| Washington State University                | 236939          | 00380000      |
| Washington University in St Louis          | 179867          | 00252000      |
| Wellesley College                          | 168218          | 00222400      |
| Western Washington University              | 237011          | 00380200      |
| Westminster College                        | 230807          | 00368100      |

TABLE 2: PROGRAMS

| Program Name       | Institution Name                       | Address                                                       |
|--------------------|----------------------------------------|---------------------------------------------------------------|
| Neurobio/Neurophys | Westminster College                    | 319 South Market Street, New Wilmington, Pennsylvania 16172   |
| Cognitive Science  | Brown University                       | One Prospect Street, Providence, Rhode Island 02912           |
| Cognitive Science  | California State University-Stanislaus | One University Circle, Turlock, California 95382              |
| Cognitive Science  | Carleton College                       | One North College Street, Northfield, Minnesota 55057-4001    |
| Cognitive Science  | Carnegie Mellon University             | 5000 Forbes Ave, Pittsburgh, Pennsylvania 15213-3890          |
| Cognitive Science  | Case Western Reserve University        | 10900 Euclid Ave, Cleveland, Ohio 44106                       |
| Cognitive Science  | Central Michigan University            | Mount Pleasant, Michigan 48859                                |
| Cognitive Science  | Dartmouth College                      | Hanover, New Hampshire 03755-3529                             |
| Cognitive Science  | George Fox University                  | 414 N Meridian St, Newberg, Oregon 97132                      |
| Cognitive Science  | Hampshire College                      | 893 West St, Amherst, Massachusetts 01002-5001                |
| Cognitive Science  | Indiana University-Bloomington         | 107 South Indiana Ave., Bloomington, Indiana 47405-7000       |
| Cognitive Science  | Johns Hopkins University               | 3400 N Charles St, Mason Hall, Baltimore, Maryland 21218-2688 |
| Cognitive Science  | Lehigh University                      | 27 Memorial Drive West, Bethlehem, Pennsylvania 18015         |
| Cognitive Science  | Massachusetts Institute of Technology  | 77 Massachusetts Avenue, Cambridge, Massachusetts 02139-4307  |
| Cognitive Science  | Minnesota State University-Mankato     | South Rd and Ellis Ave, Mankato, Minnesota 56001              |
| Cognitive Science  | Occidental College                     | 1600 Campus Rd, Los Angeles, California 90041-3392            |
| Cognitive Science  | Rice University                        | 6100 S Main, Houston, Texas 77005-1827                        |
| Cognitive Science  | Smith College                          | Elm St, Northampton, Massachusetts 01063                      |
| Cognitive Science  | Stanford University                    | Stanford, California 94305                                    |
| Cognitive Science  | The University of Texas at Dallas      | 800 West Campbell Road, Richardson, Texas 75080-3021          |
| Cognitive Science  | United States Military Academy         | 646 Swift Rd (ATTN: MASG), West Point, New York 10996-1905    |
| Cognitive Science  | University of California-Berkeley      | Berkeley, California 94720                                    |
| Cognitive Science  | University of California-Los Angeles   | 405 Hilgard Ave, Los Angeles, California 90095-1405           |
| Cognitive Science  | University of California-Merced        | 5200 North Lake Road, Merced, California 95343-5603           |
| Cognitive Science  | University of California-San Diego     | 9500 Gilman Dr, La Jolla, California 92093                    |
| Cognitive Science  | University of Delaware                 | Newark, Delaware 19716                                        |
| Cognitive Science  | University of Evansville               | 1800 Lincoln Avenue, Evansville, Indiana 47722                |
| Cognitive Science  | University of Georgia                  | Athens, Georgia 30602                                         |

TABLE 2: PROGRAMS

| Institution Name                       | Phone          | Homepage             | Type                           |
|----------------------------------------|----------------|----------------------|--------------------------------|
| Westminster College                    | (724) 946-8761 | www.westminster.edu  | 4-year, Private not-for-       |
| Brown University                       | (401) 863-1000 | www.brown.edu        | 4-year, Private not-for-       |
| California State University-Stanislaus | (209) 667-3122 | www.csustan.edu      | 4-year, Public                 |
| Carleton College                       | (507) 222-4000 | www.carleton.edu     | 4-year, Private not-for-       |
| Carnegie Mellon University             | (412) 268-2000 | www.cmu.edu/         | 4-year, Private not-for-       |
| Case Western Reserve University        | (216) 368-2000 | www.case.edu         | 4-year, Private not-for-       |
| Central Michigan University            | (989) 774-4000 | www.cmich.edu        | 4-year, Public                 |
| Dartmouth College                      | (603) 646-1110 | www.dartmouth.edu    | 4-year, Private not-for-       |
| George Fox University                  | (503) 538-8383 | www.georgefox.edu    | 4-year, Private not-for-       |
| Hampshire College                      | (413) 549-4600 | www.hampshire.edu    | 4-year, Private not-for-       |
| Indiana University-Bloomington         | (812) 855-4848 | www.iub.edu          | 4-year, Public                 |
| Johns Hopkins University               | (410) 516-8000 | www.jhu.edu          | 4-year, Private not-for-profit |
| Lehigh University                      | (610) 758-3000 | www.lehigh.edu       | 4-year, Private not-for-       |
| Massachusetts Institute of Technology  | (617) 253-1000 | web.mit.edu/student/ | 4-year, Private not-for-       |
| Minnesota State University-Mankato     | (507) 389-1866 | www.mnsu.edu         | 4-year, Public                 |
| Occidental College                     | (323) 259-2500 | www.oxy.edu          | 4-year, Private not-for-       |
| Rice University                        | (713) 348-0000 | www.rice.edu         | 4-year, Private not-for-       |
| Smith College                          | (413) 584-2700 | www.smith.edu        | 4-year, Private not-for-       |
| Stanford University                    | (650) 723-2300 | www.stanford.edu/    | 4-year, Private not-for-       |
| The University of Texas at Dallas      | (972) 883-2111 | www.utdallas.edu     | 4-year, Public                 |
| United States Military Academy         | (845) 938-4011 | www.usma.edu         | 4-year, Public                 |
| University of California-Berkeley      | (510) 642-6000 | www.berkeley.edu     | 4-year, Public                 |
| University of California-Los Angeles   | (310) 825-4321 | www.ucla.edu/        | 4-year, Public                 |
| University of California-Merced        | (209) 228-4400 | www.ucmerced.edu     | 4-year, Public                 |
| University of California-San Diego     | (858) 534-2230 | www.ucsd.edu         | 4-year, Public                 |
| University of Delaware                 | (302) 831-2000 | www.udel.edu/        | 4-year, Public                 |
| University of Evansville               | (812) 488-2000 | www.evansville.edu/  | 4-year, Private not-for-       |
| University of Georgia                  | (706) 542-3000 | www.uga.edu          | 4-year, Public                 |

TABLE 2: PROGRAMS

| <b>Institution Name</b>                | <b>Awards offered</b>                                                                                                                       |
|----------------------------------------|---------------------------------------------------------------------------------------------------------------------------------------------|
| Westminster College                    | Bachelor's degree;Master's degree                                                                                                           |
| Brown University                       | Bachelor's degree;Master's degree                                                                                                           |
| California State University-Stanislaus | Bachelor's degree;Master's degree                                                                                                           |
| Carleton College                       | Bachelor's degree                                                                                                                           |
| Carnegie Mellon University             | Bachelor's degree;Master's degree;Post-master's certificate                                                                                 |
| Case Western Reserve University        | Bachelor's degree;Postbaccalaureate certificate;Master's degree                                                                             |
| Central Michigan University            | Bachelor's degree;Postbaccalaureate certificate;Master's degree;Post-master's certificate                                                   |
| Dartmouth College                      | Bachelor's degree;Master's degree                                                                                                           |
| George Fox University                  | Bachelor's degree;Postbaccalaureate certificate;Master's degree;Post-master's certificate                                                   |
| Hampshire College                      | Bachelor's degree                                                                                                                           |
| Indiana University-Bloomington         | One but less than two years certificate;Associate's degree;Bachelor's degree;Master's degree;Post-master's certificate                      |
| Johns Hopkins University               | Two but less than 4 years certificate;Bachelor's degree;Postbaccalaureate certificate;Master's degree;Post-master's certificate             |
| Lehigh University                      | Bachelor's degree;Master's degree;Post-master's certificate                                                                                 |
| Massachusetts Institute of Technology  | Bachelor's degree;Master's degree                                                                                                           |
| Minnesota State University-Mankato     | Less than one year certificate;Associate's degree;Bachelor's degree;Postbaccalaureate certificate;Master's degree;Post-master's certificate |
| Occidental College                     | Bachelor's degree;Master's degree                                                                                                           |
| Rice University                        | Bachelor's degree;Master's degree;Post-master's certificate                                                                                 |
| Smith College                          | Bachelor's degree;Postbaccalaureate certificate;Master's degree;Post-master's certificate                                                   |
| Stanford University                    | Bachelor's degree;Master's degree;Post-master's certificate                                                                                 |
| The University of Texas at Dallas      | Bachelor's degree;Postbaccalaureate certificate;Master's degree                                                                             |
| United States Military Academy         | Bachelor's degree                                                                                                                           |
| University of California-Berkeley      | Bachelor's degree;Postbaccalaureate certificate;Master's degree                                                                             |
| University of California-Los Angeles   | Bachelor's degree;Master's degree                                                                                                           |
| University of California-Merced        | Bachelor's degree;Master's degree                                                                                                           |
| University of California-San Diego     | Bachelor's degree;Master's degree                                                                                                           |
| University of Delaware                 | Associate's degree;Bachelor's degree;Master's degree                                                                                        |
| University of Evansville               | Associate's degree;Bachelor's degree;Master's degree                                                                                        |
| University of Georgia                  | Bachelor's degree;Master's degree;Post-master's certificate                                                                                 |

TABLE 2: PROGRAMS

Ramos et al. Supplementary Material  
JUNE, Spring 2011, 9(2)

| <b>Institution Name</b>                | <b>Campus setting</b> | <b>Campus housing</b> | <b>Student population</b> | <b>Undergraduate students</b> | <b>Student-to-faculty ratio</b> |
|----------------------------------------|-----------------------|-----------------------|---------------------------|-------------------------------|---------------------------------|
| Westminster College                    | Town: Fringe          | Yes                   | 1543                      | 1471                          | 12 to 1                         |
| Brown University                       | City: Midsize         | Yes                   | 8574                      | 6244                          | 9 to 1                          |
| California State University-Stanislaus | Suburb: Small         | Yes                   | 8586                      | 7086                          | 21 to 1                         |
| Carleton College                       | Town: Distant         | Yes                   | 2009                      | 2009                          | 9 to 1                          |
| Carnegie Mellon University             | City: Large           | Yes                   | 11197                     | 5777                          | 11 to 1                         |
| Case Western Reserve University        | City: Large           | Yes                   | 9738                      | 4228                          | 9 to 1                          |
| Central Michigan University            | Town: Distant         | Yes                   | 27247                     | 20581                         | 21 to 1                         |
| Dartmouth College                      | Town: Remote          | Yes                   | 5987                      | 4196                          | 8 to 1                          |
| George Fox University                  | Town: Fringe          | Yes                   | 3388                      | 1967                          | 11 to 1                         |
| Hampshire College                      | Town: Fringe          | Yes                   | 1463                      | 1463                          | 12 to 1                         |
| Indiana University-Bloomington         | City: Small           | Yes                   | 42347                     | 32490                         | 19 to 1                         |
| Johns Hopkins University               | City: Large           | Yes                   | 20383                     | 5831                          | 11 to 1                         |
| Lehigh University                      | City: Small           | Yes                   | 6996                      | 4809                          | 10 to 1                         |
| Massachusetts Institute of Technology  | City: Midsize         | Yes                   | 10384                     | 4232                          | 8 to 1                          |
| Minnesota State University-Mankato     | Town: Remote          | Yes                   | 14955                     | 13036                         | 23 to 1                         |
| Occidental College                     | City: Large           | Yes                   | 1989                      | 1972                          | 9 to 1                          |
| Rice University                        | City: Large           | Yes                   | 5576                      | 3299                          | 8 to 1                          |
| Smith College                          | Suburb: Large         | Yes                   | 3121                      | 2614                          | 9 to 1                          |
| Stanford University                    | Suburb: Large         | Yes                   | 18498                     | 6602                          | 10 to 1                         |
| The University of Texas at Dallas      | City: Midsize         | Yes                   | 15783                     | 9801                          | 20 to 1                         |
| United States Military Academy         | Suburb: Large         | Yes                   | 4621                      | 4621                          | 7 to 1                          |
| University of California-Berkeley      | City: Midsize         | Yes                   | 35830                     | 25530                         | 16 to 1                         |
| University of California-Los Angeles   | City: Large           | Yes                   | 38550                     | 26687                         | 17 to 1                         |
| University of California-Merced        | Rural: Fringe         | Yes                   | 3414                      | 3190                          | 16 to 1                         |
| University of California-San Diego     | City: Large           | Yes                   | 28418                     | 23143                         | 19 to 1                         |
| University of Delaware                 | Suburb: Large         | Yes                   | 21138                     | 17504                         | 13 to 1                         |
| University of Evansville               | City: Midsize         | Yes                   | 2840                      | 2672                          | 14 to 1                         |
| University of Georgia                  | City: Midsize         | Yes                   | 34885                     | 26142                         | 18 to 1                         |



TABLE 2: PROGRAMS

| Institution Name                       | IPEDS ID | OPE ID   |
|----------------------------------------|----------|----------|
| Westminster College                    | 216807   | 00339200 |
| Brown University                       | 217156   | 00340100 |
| California State University-Stanislaus | 110495   | 00115700 |
| Carleton College                       | 173258   | 00234000 |
| Carnegie Mellon University             | 211440   | 00324200 |
| Case Western Reserve University        | 201645   | 00302400 |
| Central Michigan University            | 169248   | 00224300 |
| Dartmouth College                      | 182670   | 00257300 |
| George Fox University                  | 208822   | 00319400 |
| Hampshire College                      | 166018   | 00466100 |
| Indiana University-Bloomington         | 151351   | 00180900 |
| Johns Hopkins University               | 162928   | 00207700 |
| Lehigh University                      | 213543   | 00328900 |
| Massachusetts Institute of Technology  | 166683   | 00217800 |
| Minnesota State University-Mankato     | 173920   | 00236000 |
| Occidental College                     | 120254   | 00124900 |
| Rice University                        | 227757   | 00360400 |
| Smith College                          | 167835   | 00220900 |
| Stanford University                    | 243744   | 00130500 |
| The University of Texas at Dallas      | 228787   | 00974100 |
| United States Military Academy         | 197036   | 00289300 |
| University of California-Berkeley      | 110635   | 00131200 |
| University of California-Los Angeles   | 110662   | 00131500 |
| University of California-Merced        | 445188   | 04127100 |
| University of California-San Diego     | 110680   | 00131700 |
| University of Delaware                 | 130943   | 00143100 |
| University of Evansville               | 150534   | 00179500 |
| University of Georgia                  | 139959   | 00159800 |

TABLE 2: PROGRAMS

| Program Name      | Institution Name                 | Address                                                                   |
|-------------------|----------------------------------|---------------------------------------------------------------------------|
| Cognitive Science | University of Pennsylvania       | 1 College Hall 34th and Spruce Sts, Philadelphia, Pennsylvania 19104-6303 |
| Cognitive Science | University of Richmond           | 28 Westhampton Way, Richmond, Virginia 23173                              |
| Cognitive Science | Vanderbilt University            | 2101 West End Avenue, Nashville, Tennessee 37240                          |
| Cognitive Science | Vassar College                   | 124 Raymond Ave, Poughkeepsie, New York 12604                             |
| Cognitive Science | Yale University                  | New Haven, Connecticut 06520                                              |
| Biopsychology     | Birmingham Southern College      | 900 Arkadelphia Road, Birmingham, Alabama 35254                           |
| Biopsychology     | Carnegie Mellon University       | 5000 Forbes Ave, Pittsburgh, Pennsylvania 15213-3890                      |
| Biopsychology     | Cedar Crest College              | 100 College Drive, Allentown, Pennsylvania 18104-6196                     |
| Biopsychology     | Chapman University               | One University Dr., Orange, California 92866                              |
| Biopsychology     | Davis & Elkins College           | 100 Campus Dr, Elkins, West Virginia 26241-3996                           |
| Biopsychology     | Earlham College                  | 801 National Rd West, Richmond, Indiana 47374-4095                        |
| Biopsychology     | Eckerd College                   | 4200 54th Ave S, Saint Petersburg, Florida 33711-4700                     |
| Biopsychology     | Grand Valley State University    | 1 Campus Dr, Allendale, Michigan 49401-9403                               |
| Biopsychology     | Hastings College                 | 710 N Turner Ave, Hastings, Nebraska 68901                                |
| Biopsychology     | Immaculata University            | 1145 King Rd, Immaculata, Pennsylvania 19345-0702                         |
| Biopsychology     | Life University                  | 1269 Barclay Circle, Marietta, Georgia 30060                              |
| Biopsychology     | Long Island University-Riverhead | 121 Speonk-Riverhead Rd, Riverhead, New York 11901-3499                   |
| Biopsychology     | Medaille College                 | 18 Agassiz Circle, Buffalo, New York 14214-2695                           |
| Biopsychology     | Messiah College                  | One College Ave, Grantham, Pennsylvania 17027                             |
| Biopsychology     | Mills College                    | 5000 MacArthur Blvd, Oakland, California 94613                            |
| Biopsychology     | Monmouth College                 | 700 E Broadway, Monmouth, Illinois 61462-1998                             |
| Biopsychology     | Morningside College              | 1501 Morningside Ave, Sioux City, Iowa 51106-1751                         |
| Biopsychology     | Muhlenberg College               | 2400 Chew Street, Allentown, Pennsylvania 18104                           |
| Biopsychology     | Nebraska Wesleyan University     | 5000 St Paul Ave, Lincoln, Nebraska 68504-2794                            |
| Biopsychology     | Oglethorpe University            | 4484 Peachtree Rd NE, Atlanta, Georgia 30319-2797                         |
| Biopsychology     | Pepperdine University            | 24255 Pacific Coast Hwy, Malibu, California 90263                         |
| Biopsychology     | Rider University                 | 2083 Lawrence Road, Lawrenceville, New Jersey 08648-3099                  |
| Biopsychology     | Viterbo University               | 900 Viterbo Drive, La Crosse, Wisconsin 54601-8804                        |

TABLE 2: PROGRAMS

| Institution Name                 | Phone          | Homepage               | Type                           |
|----------------------------------|----------------|------------------------|--------------------------------|
| University of Pennsylvania       | (215) 898-5000 | www.upenn.edu          | 4-year, Private not-for-profit |
| University of Richmond           | (804) 289-8000 | www.richmond.edu       | 4-year, Private not-for-       |
| Vanderbilt University            | (615) 322-7311 | www.vanderbilt.edu     | 4-year, Private not-for-       |
| Vassar College                   | (845) 437-7000 | www.vassar.edu         | 4-year, Private not-for-       |
| Yale University                  | (203) 432-1333 | www.yale.edu           | 4-year, Private not-for-       |
| Birmingham Southern College      | (205) 226-4600 | www.bsc.edu            | 4-year, Private not-for-       |
| Carnegie Mellon University       | (412) 268-2000 | www.cmu.edu/           | 4-year, Private not-for-       |
| Cedar Crest College              | (610) 606-4666 | www.cedarcrest.edu     | 4-year, Private not-for-profit |
| Chapman University               | (714) 997-6815 | www.chapman.edu        | 4-year, Private not-for-       |
| Davis & Elkins College           | (304) 637-1900 | www.davisandelkins.edu | 4-year, Private not-for-       |
| Earlham College                  | (765) 983-1200 | www.earlham.edu        | 4-year, Private not-for-       |
| Eckerd College                   | (727) 867-1166 | www.eckerd.edu         | 4-year, Private not-for-       |
| Grand Valley State University    | (616) 331-2020 | www.gvsu.edu           | 4-year, Public                 |
| Hastings College                 | (402) 463-2402 | www.hastings.edu       | 4-year, Private not-for-       |
| Immaculata University            | (610) 647-4400 | www.immaculata.edu     | 4-year, Private not-for-       |
| Life University                  | (800) 543-3202 | www.life.edu           | 4-year, Private not-for-       |
| Long Island University-Riverhead | (631) 287-8010 | liu.edu                | 4-year, Private not-for-       |
| Medaille College                 | (716) 880-2000 | www.medaille.edu       | 4-year, Private not-for-       |
| Messiah College                  | (717) 766-2511 | www.messiah.edu        | 4-year, Private not-for-       |
| Mills College                    | (510) 430-2255 | www.mills.edu          | 4-year, Private not-for-       |
| Monmouth College                 | (309) 457-2311 | www.monm.edu           | 4-year, Private not-for-       |
| Morningside College              | (712) 274-5000 | www.morningside.edu    | 4-year, Private not-for-       |
| Muhlenberg College               | (484) 664-3100 | www.muhlenberg.edu     | 4-year, Private not-for-profit |
| Nebraska Wesleyan University     | (402) 466-2371 | www.nebrwesleyan.edu/  | 4-year, Private not-for-       |
| Oglethorpe University            | (404) 261-1441 | www.oglethorpe.edu     | 4-year, Private not-for-       |
| Pepperdine University            | (310) 506-4000 | www.pepperdine.edu/    | 4-year, Private not-for-       |
| Rider University                 | (609) 896-5000 | www.rider.edu          | 4-year, Private not-for-       |
| Viterbo University               | (608) 796-3000 | www.viterbo.edu        | 4-year, Private not-for-       |

TABLE 2: PROGRAMS

| Institution Name                 | Awards offered                                                                                                                                                                                                                   |
|----------------------------------|----------------------------------------------------------------------------------------------------------------------------------------------------------------------------------------------------------------------------------|
| University of Pennsylvania       | Less than one year certificate; One but less than two years certificate; Associate's degree; Two but less than 4 years certificate; Bachelor's degree; Postbaccalaureate certificate; Master's degree; Post-master's certificate |
| University of Richmond           | Less than one year certificate; Associate's degree; Bachelor's degree; Postbaccalaureate certificate; Master's degree                                                                                                            |
| Vanderbilt University            | Bachelor's degree; Master's degree                                                                                                                                                                                               |
| Vassar College                   | Bachelor's degree; Master's degree                                                                                                                                                                                               |
| Yale University                  | Bachelor's degree; Postbaccalaureate certificate; Master's degree; Post-master's certificate                                                                                                                                     |
| Birmingham Southern College      | Bachelor's degree; Master's degree                                                                                                                                                                                               |
| Carnegie Mellon University       | Bachelor's degree; Master's degree; Post-master's certificate                                                                                                                                                                    |
| Cedar Crest College              | One but less than two years certificate; Two but less than 4 years certificate; Bachelor's degree; Postbaccalaureate certificate; Master's degree                                                                                |
| Chapman University               | Bachelor's degree; Postbaccalaureate certificate; Master's degree                                                                                                                                                                |
| Davis & Elkins College           | Associate's degree; Bachelor's degree                                                                                                                                                                                            |
| Earlham College                  | Bachelor's degree; Master's degree                                                                                                                                                                                               |
| Eckerd College                   | Bachelor's degree                                                                                                                                                                                                                |
| Grand Valley State University    | Bachelor's degree; Postbaccalaureate certificate; Master's degree; Post-master's certificate                                                                                                                                     |
| Hastings College                 | Bachelor's degree; Master's degree                                                                                                                                                                                               |
| Immaculata University            | Associate's degree; Bachelor's degree; Master's degree                                                                                                                                                                           |
| Life University                  | Associate's degree; Bachelor's degree; Master's degree                                                                                                                                                                           |
| Long Island University-Riverhead | Bachelor's degree; Master's degree; Post-master's certificate                                                                                                                                                                    |
| Medaille College                 | Less than one year certificate; Associate's degree; Bachelor's degree; Postbaccalaureate certificate; Master's degree                                                                                                            |
| Messiah College                  | Bachelor's degree; Master's degree; Post-master's certificate                                                                                                                                                                    |
| Mills College                    | Two but less than 4 years certificate; Bachelor's degree; Postbaccalaureate certificate; Master's degree                                                                                                                         |
| Monmouth College                 | Bachelor's degree                                                                                                                                                                                                                |
| Morningside College              | Bachelor's degree; Master's degree                                                                                                                                                                                               |
| Muhlenberg College               | Less than one year certificate; One but less than two years certificate; Associate's degree; Two but less than 4 years certificate; Bachelor's degree                                                                            |
| Nebraska Wesleyan University     | Less than one year certificate; Bachelor's degree; Postbaccalaureate certificate; Master's degree; Post-master's certificate                                                                                                     |
| Oglethorpe University            | Bachelor's degree; Master's degree                                                                                                                                                                                               |
| Pepperdine University            | Bachelor's degree; Master's degree                                                                                                                                                                                               |
| Rider University                 | Associate's degree; Bachelor's degree; Postbaccalaureate certificate; Master's degree; Post-master's certificate                                                                                                                 |
| Viterbo University               | Associate's degree; Bachelor's degree; Postbaccalaureate certificate; Master's degree; Post-master's certificate                                                                                                                 |

TABLE 2: PROGRAMS

Ramos et al. Supplementary Material  
JUNE, Spring 2011, 9(2)

| Institution Name                 | Campus setting | Campus housing | Student population | Undergraduate students | Student-to-faculty ratio |
|----------------------------------|----------------|----------------|--------------------|------------------------|--------------------------|
| University of Pennsylvania       | City: Large    | Yes            | 24599              | 11954                  | 6 to 1                   |
| University of Richmond           | City: Midsize  | Yes            | 4344               | 3387                   | 8 to 1                   |
| Vanderbilt University            | City: Large    | Yes            | 12506              | 6794                   | 8 to 1                   |
| Vassar College                   | City: Small    | Yes            | 2453               | 2452                   | 8 to 1                   |
| Yale University                  | City: Midsize  | Yes            | 11593              | 5275                   | 6 to 1                   |
| Birmingham Southern College      | City: Midsize  | Yes            | 1549               | 1508                   | 12 to 1                  |
| Carnegie Mellon University       | City: Large    | Yes            | 11197              | 5777                   | 11 to 1                  |
| Cedar Crest College              | City: Midsize  | Yes            | 1887               | 1685                   | 11 to 1                  |
| Chapman University               | City: Midsize  | Yes            | 6398               | 4476                   | 14 to 1                  |
| Davis & Elkins College           | Town: Remote   | Yes            | 710                | 710                    | 13 to 1                  |
| Earlham College                  | Town: Distant  | Yes            | 1266               | 1127                   | 12 to 1                  |
| Eckerd College                   | City: Midsize  | Yes            | 2520               | 2520                   | 14 to 1                  |
| Grand Valley State University    | Suburb: Large  | Yes            | 24408              | 20850                  | 17 to 1                  |
| Hastings College                 | Town: Remote   | Yes            | 1154               | 1104                   | 10 to 1                  |
| Immaculata University            | Suburb: Large  | Yes            | 4302               | 3071                   | 11 to 1                  |
| Life University                  | City: Small    | Yes            | 2301               | 727                    | 14 to 1                  |
| Long Island University-Riverhead | Rural: Fringe  | No             | 268                | 14                     | 14 to 1                  |
| Medaille College                 | City: Large    | Yes            | 2927               | 1816                   | 16 to 1                  |
| Messiah College                  | Suburb: Large  | Yes            | 2801               | 2766                   | 13 to 1                  |
| Mills College                    | City: Large    | Yes            | 1501               | 921                    | 12 to 1                  |
| Monmouth College                 | Town: Distant  | Yes            | 1379               | 1379                   | 14 to 1                  |
| Morningside College              | City: Small    | Yes            | 2036               | 1239                   | 14 to 1                  |
| Muhlenberg College               | City: Midsize  | Yes            | 2517               | 2517                   | 12 to 1                  |
| Nebraska Wesleyan University     | City: Large    | Yes            | 2093               | 1852                   | 13 to 1                  |
| Oglethorpe University            | Suburb: Large  | Yes            | 1100               | 1031                   | 16 to 1                  |
| Pepperdine University            | Suburb: Large  | Yes            | 7733               | 3439                   | 13 to 1                  |
| Rider University                 | Suburb: Large  | Yes            | 6036               | 4856                   | 13 to 1                  |
| Viterbo University               | City: Small    | Yes            | 3282               | 2207                   | 14 to 1                  |

TABLE 2: PROGRAMS

| Institution Name                 | IPEDS ID | OPE ID   |
|----------------------------------|----------|----------|
| University of Pennsylvania       | 215062   | 00337800 |
| University of Richmond           | 233374   | 00374400 |
| Vanderbilt University            | 221999   | 00353500 |
| Vassar College                   | 197133   | 00289500 |
| Yale University                  | 130794   | 00142600 |
| Birmingham Southern College      | 100937   | 00101200 |
| Carnegie Mellon University       | 211440   | 00324200 |
| Cedar Crest College              | 211468   | 00324300 |
| Chapman University               | 111948   | 00116400 |
| Davis & Elkins College           | 237358   | 00381100 |
| Earlham College                  | 150455   | 00179300 |
| Eckerd College                   | 133492   | 00148700 |
| Grand Valley State University    | 170082   | 00226800 |
| Hastings College                 | 181127   | 00254800 |
| Immaculata University            | 213011   | 00327600 |
| Life University                  | 140252   | 02074800 |
| Long Island University-Riverhead | 450766   | 002751   |
| Medaille College                 | 192925   | 00277700 |
| Messiah College                  | 213996   | 00329800 |
| Mills College                    | 118888   | 00123800 |
| Monmouth College                 | 147341   | 00172500 |
| Morningside College              | 154004   | 00187900 |
| Muhlenberg College               | 214175   | 00330400 |
| Nebraska Wesleyan University     | 181446   | 00255500 |
| Oglethorpe University            | 140696   | 00158600 |
| Pepperdine University            | 121150   | 01014900 |
| Rider University                 | 186283   | 00262800 |
| Viterbo University               | 240107   | 00391100 |

TABLE 2: PROGRAMS

| Program Name              | Institution Name                       | Address                                                          |
|---------------------------|----------------------------------------|------------------------------------------------------------------|
| Biopsychology             | Wagner College                         | One Campus Rd, Staten Island, New York 10301-4495                |
| Physiopsych/Psychobiology | Albright College                       | 1621 N. 13th St., Reading, Pennsylvania 19612-5234               |
| Physiopsych/Psychobiology | Arcadia University                     | 450 S Easton Rd, Glenside, Pennsylvania 19038-3295               |
| Physiopsych/Psychobiology | Averett University                     | 420 W Main St, Danville, Virginia 24541                          |
| Physiopsych/Psychobiology | Carnegie Mellon University             | 5000 Forbes Ave, Pittsburgh, Pennsylvania 15213-3890             |
| Physiopsych/Psychobiology | Centre College                         | 600 W Walnut St, Danville, Kentucky 40422-1394                   |
| Physiopsych/Psychobiology | Colorado Christian University          | 8787 West Alameda Avenue, Lakewood, Colorado 80226               |
| Physiopsych/Psychobiology | Florida Atlantic University            | 777 Glades Rd, Boca Raton, Florida 33431-0991                    |
| Physiopsych/Psychobiology | Heidelberg University                  | 310 E Market St, Tiffin, Ohio 44883-2462                         |
| Physiopsych/Psychobiology | Hiram College                          | Hinsdale Hall Third Floor, Hiram, Ohio 44234-0067                |
| Physiopsych/Psychobiology | La Sierra University                   | 4500 Riverwalk Parkway, Riverside, California 92515-8247         |
| Physiopsych/Psychobiology | Lebanon Valley College                 | 101 N College Ave, Annville, Pennsylvania 17003-1400             |
| Physiopsych/Psychobiology | Lincoln University of Pennsylvania     | 1570 Baltimore Pike, Lincoln University, Pennsylvania 19352-0999 |
| Physiopsych/Psychobiology | Northwest Missouri State University    | 800 University Drive, Maryville, Missouri 64468-6001             |
| Physiopsych/Psychobiology | Occidental College                     | 1600 Campus Rd, Los Angeles, California 90041-3392               |
| Physiopsych/Psychobiology | Pace University-New York               | 1 Pace Plaza, New York, New York 10038-1598                      |
| Physiopsych/Psychobiology | Pepperdine University                  | 24255 Pacific Coast Hwy, Malibu, California 90263                |
| Physiopsych/Psychobiology | Quinnipiac University                  | Mt Carmel Ave, Hamden, Connecticut 06518                         |
| Physiopsych/Psychobiology | Saint Marys College of California      | 1928 Saint Marys Road, Moraga, California 94556                  |
| Physiopsych/Psychobiology | Simmons College                        | 300 The Fenway, Boston, Massachusetts 02115-5898                 |
| Physiopsych/Psychobiology | Southern Adventist University          | 4881 Taylor Cir, Collegedale, Tennessee 37315-0370               |
| Physiopsych/Psychobiology | Swarthmore College                     | 500 College Ave, Swarthmore, Pennsylvania 19081                  |
| Physiopsych/Psychobiology | University of California-Los Angeles   | 405 Hilgard Ave, Los Angeles, California 90095-1405              |
| Physiopsych/Psychobiology | University of California-Santa Barbara | Santa Barbara, California 93106                                  |
| Physiopsych/Psychobiology | University of California-Santa Cruz    | 1156 High St, Santa Cruz, California 95064-1011                  |
| Physiopsych/Psychobiology | University of Colorado Denver          | Denver, Colorado 80217-3364                                      |
| Physiopsych/Psychobiology | University of Michigan-Ann Arbor       | Ann Arbor, Michigan 48109                                        |
| Physiopsych/Psychobiology | University of New England              | 11 Hills Beach Rd, Biddeford, Maine 04005                        |

TABLE 2: PROGRAMS

| Institution Name                       | Phone          | Homepage            | Type                           |
|----------------------------------------|----------------|---------------------|--------------------------------|
| Wagner College                         | (718) 390-3100 | www.wagner.edu      | 4-year, Private not-for-       |
| Albright College                       | (610) 921-2381 | www.albright.edu    | 4-year, Private not-for-       |
| Arcadia University                     | (215) 572-2900 | www.arcadia.edu     | 4-year, Private not-for-       |
| Averett University                     | (434) 791-5600 | www.averett.edu     | 4-year, Private not-for-       |
| Carnegie Mellon University             | (412) 268-2000 | www.cmu.edu/        | 4-year, Private not-for-       |
| Centre College                         | (859) 238-5200 | www.centre.edu      | 4-year, Private not-for-       |
| Colorado Christian University          | (303) 963-3000 | WWW.CCU.EDU         | 4-year, Private not-for-       |
| Florida Atlantic University            | (561) 297-3000 | www.fau.edu/        | 4-year, Public                 |
| Heidelberg University                  | (419) 448-2000 | www.heidelberg.edu  | 4-year, Private not-for-       |
| Hiram College                          | (330) 569-3211 | WWW.HIRAM.EDU       | 4-year, Private not-for-       |
| La Sierra University                   | (951) 785-2000 | www.lasierra.edu    | 4-year, Private not-for-       |
| Lebanon Valley College                 | (717) 867-6100 | www.lvc.edu         | 4-year, Private not-for-profit |
| Lincoln University of Pennsylvania     | (484) 365-8000 | www.lincoln.edu     | 4-year, Public                 |
| Northwest Missouri State University    | (660) 562-1212 | www.nwmissouri.edu  | 4-year, Public                 |
| Occidental College                     | (323) 259-2500 | www.oxy.edu         | 4-year, Private not-for-       |
| Pace University-New York               | (212) 346-1200 | www.pace.edu        | 4-year, Private not-for-profit |
| Pepperdine University                  | (310) 506-4000 | www.pepperdine.edu/ | 4-year, Private not-for-       |
| Quinnipiac University                  | (203) 582-8200 | www.quinnipiac.edu  | 4-year, Private not-for-       |
| Saint Marys College of California      | (925) 631-4000 | www.stmarys-ca.edu  | 4-year, Private not-for-       |
| Simmons College                        | (617) 521-2000 | www.simmons.edu     | 4-year, Private not-for-       |
| Southern Adventist University          | (423) 236-2000 | www.southern.edu    | 4-year, Private not-for-       |
| Swarthmore College                     | (610) 328-8000 | www.swarthmore.edu  | 4-year, Private not-for-       |
| University of California-Los Angeles   | (310) 825-4321 | www.ucla.edu/       | 4-year, Public                 |
| University of California-Santa Barbara | (805) 893-8000 | www.ucsb.edu        | 4-year, Public                 |
| University of California-Santa Cruz    | (831) 459-0111 | www.ucsc.edu/       | 4-year, Public                 |
| University of Colorado Denver          | (303) 556-5600 | www.ucdenver.edu/   | 4-year, Public                 |
| University of Michigan-Ann Arbor       | (734) 764-1817 | www.umich.edu       | 4-year, Public                 |
| University of New England              | (207) 283-0171 | www.une.edu/        | 4-year, Private not-for-       |



TABLE 2: PROGRAMS

| <b>Institution Name</b>                | <b>Awards offered</b>                                                                                                                                |
|----------------------------------------|------------------------------------------------------------------------------------------------------------------------------------------------------|
| Wagner College                         | Bachelor's degree;Master's degree                                                                                                                    |
| Albright College                       | One but less than two years certificate;Bachelor's degree;Master's degree                                                                            |
| Arcadia University                     | Bachelor's degree;Postbaccalaureate certificate;Master's degree;Post-master's certificate                                                            |
| Averett University                     | Associate's degree;Bachelor's degree;Master's degree                                                                                                 |
| Carnegie Mellon University             | Bachelor's degree;Master's degree;Post-master's certificate                                                                                          |
| Centre College                         | Bachelor's degree                                                                                                                                    |
| Colorado Christian University          | Less than one year certificate;Associate's degree;Bachelor's degree;Master's degree                                                                  |
| Florida Atlantic University            | Associate's degree;Bachelor's degree;Master's degree;Post-master's certificate                                                                       |
| Heidelberg University                  | Bachelor's degree;Master's degree                                                                                                                    |
| Hiram College                          | Bachelor's degree;Master's degree                                                                                                                    |
| La Sierra University                   | One but less than two years certificate;Bachelor's degree;Master's degree;Post-master's certificate                                                  |
| Lebanon Valley College                 | One but less than two years certificate;Associate's degree;Bachelor's degree;Postbaccalaureate certificate;Master's degree                           |
| Lincoln University of Pennsylvania     | Bachelor's degree;Master's degree                                                                                                                    |
| Northwest Missouri State University    | One but less than two years certificate;Associate's degree;Bachelor's degree;Postbaccalaureate certificate;Master's degree;Post-master's certificate |
| Occidental College                     | Bachelor's degree;Master's degree                                                                                                                    |
| Pace University-New York               | Less than one year certificate;Associate's degree;Bachelor's degree;Postbaccalaureate certificate;Master's degree;Post-master's certificate          |
| Pepperdine University                  | Bachelor's degree;Master's degree                                                                                                                    |
| Quinnipiac University                  | Bachelor's degree;Postbaccalaureate certificate;Master's degree                                                                                      |
| Saint Marys College of California      | Associate's degree;Bachelor's degree;Postbaccalaureate certificate;Master's degree                                                                   |
| Simmons College                        | Bachelor's degree;Postbaccalaureate certificate;Master's degree;Post-master's certificate                                                            |
| Southern Adventist University          | One but less than two years certificate;Associate's degree;Bachelor's degree;Master's degree;Post-master's certificate                               |
| Swarthmore College                     | Bachelor's degree                                                                                                                                    |
| University of California-Los Angeles   | Bachelor's degree;Master's degree                                                                                                                    |
| University of California-Santa Barbara | Bachelor's degree;Postbaccalaureate certificate;Master's degree;Post-master's certificate                                                            |
| University of California-Santa Cruz    | Bachelor's degree;Master's degree                                                                                                                    |
| University of Colorado Denver          | Bachelor's degree;Master's degree;Post-master's certificate                                                                                          |
| University of Michigan-Ann Arbor       | Bachelor's degree;Postbaccalaureate certificate;Master's degree;Post-master's certificate                                                            |
| University of New England              | Associate's degree;Bachelor's degree;Postbaccalaureate certificate;Master's degree;Post-master's certificate                                         |

TABLE 2: PROGRAMS

Ramos et al. Supplementary Material  
JUNE, Spring 2011, 9(2)

| Institution Name                       | Campus setting  | Campus housing | Student population | Undergraduate students | Student-to-faculty ratio |
|----------------------------------------|-----------------|----------------|--------------------|------------------------|--------------------------|
| Wagner College                         | City: Large     | Yes            | 2265               | 1870                   | 14 to 1                  |
| Albright College                       | City: Small     | Yes            | 2358               | 2282                   | 15 to 1                  |
| Arcadia University                     | Suburb: Large   | Yes            | 3953               | 2214                   | 13 to 1                  |
| Averett University                     | City: Small     | Yes            | 917                | 866                    | 12 to 1                  |
| Carnegie Mellon University             | City: Large     | Yes            | 11197              | 5777                   | 11 to 1                  |
| Centre College                         | Town: Distant   | Yes            | 1216               | 1216                   | 11 to 1                  |
| Colorado Christian University          | Suburb: Large   | Yes            | 2511               | 2077                   | 9 to 1                   |
| Florida Atlantic University            | City: Small     | Yes            | 27637              | 22843                  | 18 to 1                  |
| Heidelberg University                  | Town: Distant   | Yes            | 1478               | 1263                   | 16 to 1                  |
| Hiram College                          | Rural: Distant  | Yes            | 1395               | 1367                   | 12 to 1                  |
| La Sierra University                   | City: Large     | Yes            | 1857               | 1505                   | 13 to 1                  |
| Lebanon Valley College                 | Suburb: Small   | Yes            | 2045               | 1747                   | 13 to 1                  |
| Lincoln University of Pennsylvania     | Rural: Fringe   | Yes            | 2649               | 2035                   | 16 to 1                  |
| Northwest Missouri State University    | Town: Remote    | Yes            | 7076               | 6051                   | 21 to 1                  |
| Occidental College                     | City: Large     | Yes            | 1989               | 1972                   | 9 to 1                   |
| Pace University-New York               | City: Large     | Yes            | 12706              | 7971                   | 15 to 1                  |
| Pepperdine University                  | Suburb: Large   | Yes            | 7733               | 3439                   | 13 to 1                  |
| Quinnipiac University                  | Rural: Fringe   | Yes            | 7758               | 5971                   | 14 to 1                  |
| Saint Marys College of California      | Suburb: Large   | Yes            | 3636               | 2539                   | 12 to 1                  |
| Simmons College                        | City: Large     | Yes            | 5003               | 1969                   | 13 to 1                  |
| Southern Adventist University          | Suburb: Large   | Yes            | 2891               | 2647                   | 16 to 1                  |
| Swarthmore College                     | Suburb: Large   | Yes            | 1525               | 1525                   | 8 to 1                   |
| University of California-Los Angeles   | City: Large     | Yes            | 38550              | 26687                  | 17 to 1                  |
| University of California-Santa Barbara | Suburb: Midsize | Yes            | 22850              | 19796                  | 17 to 1                  |
| University of California-Santa Cruz    | City: Small     | Yes            | 16775              | 15259                  | 18 to 1                  |
| University of Colorado Denver          | City: Large     | Yes            | 23715              | 13246                  | 20 to 1                  |
| University of Michigan-Ann Arbor       | City: Midsize   | Yes            | 41674              | 26208                  | 12 to 1                  |
| University of New England              | City: Small     | Yes            | 4493               | 2441                   | 13 to 1                  |

TABLE 2: PROGRAMS

| <b>Institution Name</b>                | <b>IPEDS ID</b> | <b>OPE ID</b> |
|----------------------------------------|-----------------|---------------|
| Wagner College                         | 197197          | 00289900      |
| Albright College                       | 210571          | 00322900      |
| Arcadia University                     | 211088          | 00323500      |
| Averett University                     | 231420          | 00370200      |
| Carnegie Mellon University             | 211440          | 00324200      |
| Centre College                         | 156408          | 00196100      |
| Colorado Christian University          | 126669          | 00940100      |
| Florida Atlantic University            | 133669          | 00148100      |
| Heidelberg University                  | 203085          | 00304800      |
| Hiram College                          | 203128          | 00304900      |
| La Sierra University                   | 117627          | 00121500      |
| Lebanon Valley College                 | 213507          | 00328800      |
| Lincoln University of Pennsylvania     | 213598          | 00329000      |
| Northwest Missouri State University    | 178624          | 00249600      |
| Occidental College                     | 120254          | 00124900      |
| Pace University-New York               | 194310          | 00279100      |
| Pepperdine University                  | 121150          | 01014900      |
| Quinnipiac University                  | 130226          | 00140200      |
| Saint Marys College of California      | 123554          | 00130200      |
| Simmons College                        | 167783          | 00220800      |
| Southern Adventist University          | 221661          | 00351800      |
| Swarthmore College                     | 216287          | 00337000      |
| University of California-Los Angeles   | 110662          | 00131500      |
| University of California-Santa Barbara | 110705          | 00132000      |
| University of California-Santa Cruz    | 110714          | 00132100      |
| University of Colorado Denver          | 126562          | 00450800      |
| University of Michigan-Ann Arbor       | 170976          | 00232500      |
| University of New England              | 161457          | 00205000      |

TABLE 2: PROGRAMS

| <b>Program Name</b>       | <b>Institution Name</b>       | <b>Address</b>                                               |
|---------------------------|-------------------------------|--------------------------------------------------------------|
| Physiopsych/Psychobiology | University of St Thomas       | 3800 Montrose Blvd, Houston, Texas 77006-4696                |
| Physiopsych/Psychobiology | Wesleyan University           | 237 High St, Middletown, Connecticut 06459                   |
| Physiopsych/Psychobiology | Western Washington University | 516 High St, Bellingham, Washington 98225-9008               |
| Physiopsych/Psychobiology | Wheaton College               | 26 E Main St, Norton, Massachusetts 02766                    |
| Physiopsych/Psychobiology | Wilson College                | 1015 Philadelphia Ave, Chambersburg, Pennsylvania 17201-1285 |

TABLE 2: PROGRAMS

| <b>Institution Name</b>       | <b>Phone</b>   | <b>Homepage</b>                                                    | <b>Type</b>              |
|-------------------------------|----------------|--------------------------------------------------------------------|--------------------------|
| University of St Thomas       | (713) 522-7911 | <a href="http://www.stthom.edu">www.stthom.edu</a>                 | 4-year, Private not-for- |
| Wesleyan University           | (860) 685-2000 | <a href="http://www.wesleyan.edu">www.wesleyan.edu</a>             | 4-year, Private not-for- |
| Western Washington University | (360) 650-3000 | <a href="http://www.wvu.edu">www.wvu.edu</a>                       | 4-year, Public           |
| Wheaton College               | (508) 285-7722 | <a href="http://www.wheatoncollege.edu">www.wheatoncollege.edu</a> | 4-year, Private not-for- |
| Wilson College                | (717) 264-4141 | <a href="http://www.wilson.edu">www.wilson.edu</a>                 | 4-year, Private not-for- |

TABLE 2: PROGRAMS

| <b>Institution Name</b>       | <b>Awards offered</b>                                                     |
|-------------------------------|---------------------------------------------------------------------------|
| University of St Thomas       | One but less than two years certificate;Bachelor's degree;Master's degree |
| Wesleyan University           | Bachelor's degree;Master's degree;Post-master's certificate               |
| Western Washington University | Bachelor's degree;Master's degree                                         |
| Wheaton College               | Bachelor's degree                                                         |
| Wilson College                | Associate's degree;Bachelor's degree;Master's degree                      |

TABLE 2: PROGRAMS

Ramos et al. Supplementary Material  
JUNE, Spring 2011, 9(2)

| <b>Institution Name</b>       | <b>Campus setting</b> | <b>Campus housing</b> | <b>Student population</b> | <b>Undergraduate students</b> | <b>Student-to-faculty ratio</b> |
|-------------------------------|-----------------------|-----------------------|---------------------------|-------------------------------|---------------------------------|
| University of St Thomas       | City: Large           | Yes                   | 3132                      | 1713                          | 12 to 1                         |
| Wesleyan University           | City: Small           | Yes                   | 3148                      | 2787                          | 9 to 1                          |
| Western Washington University | City: Small           | Yes                   | 14575                     | 13396                         | 19 to 1                         |
| Wheaton College               | Suburb: Large         | Yes                   | 1632                      | 1632                          | 11 to 1                         |
| Wilson College                | Town: Distant         | Yes                   | 840                       | 809                           | 10 to 1                         |

TABLE 2: PROGRAMS

| <b>Institution Name</b>       | <b>IPEDS ID</b> | <b>OPE ID</b> |
|-------------------------------|-----------------|---------------|
| University of St Thomas       | 227863          | 00365400      |
| Wesleyan University           | 130697          | 00142400      |
| Western Washington University | 237011          | 00380200      |
| Wheaton College               | 168281          | 00222700      |
| Wilson College                | 217013          | 00339600      |
