# Supplementary material
Source: PubMed Central journal article supplement (PMC3592722)
Supplement: june-9-66-s003.pdf [file june-9-66-s003.pdf]

| UnitID | Institution Name                            | 1986 | 1987 | 1988 | 1989 | 1990 | 1991 | 1992 | 1993 | 1994 | 1995 | 1996 | 1997 | 1999 | 2000 | 2001 | 2002 | 2003 | 2004 | 2005 | 2006 | 2007 | 2008 |
|--------|---------------------------------------------|------|------|------|------|------|------|------|------|------|------|------|------|------|------|------|------|------|------|------|------|------|------|
| 210669 | Allegheny College                           |      |      |      |      |      |      |      |      |      |      | 1    | 12   | 16   | 28   | 30   | 33   | 27   | 18   | 28   | 21   | 27   | 28   |
| 164465 | Amherst College                             | 8    | 11   | 7    | 9    | 8    | 6    | 9    | 15   | 11   | 11   | 13   | 6    | 16   | 14   | 12   | 3    | 8    | 13   | 10   | 11   | 16   | 10   |
| 201195 | Baldwin-Wallace College                     |      |      |      |      |      |      |      |      |      |      |      |      |      |      | 1    | 2    | 1    | 0    | 5    | 2    | 4    | 2    |
| 189097 | Barnard College                             |      |      |      |      |      |      |      |      |      |      |      |      |      |      |      |      |      |      | 18   | 23   | 14   | 31   |
| 160977 | Bates College                               |      |      |      |      |      |      |      |      |      |      |      |      | 6    | 8    | 4    | 7    | 14   | 16   | 6    | 11   | 13   | 8    |
| 223232 | Baylor University                           |      |      |      |      |      |      |      |      |      |      |      |      |      |      |      |      | 10   | 18   | 21   | 15   | 14   | 22   |
| 164988 | Boston University                           |      |      |      |      |      |      |      |      |      |      |      |      |      |      |      | 16   | 10   | 13   | 15   | 19   | 21   | 25   |
| 161004 | Bowdoin College                             |      |      | 3    | 3    | 2    | 1    | 3    | 8    |      |      | 12   | 8    | 7    | 5    | 6    | 9    | 9    | 8    | 13   | 16   | 13   | 19   |
| 201441 | Bowling Green State University-Main Campus  |      |      |      |      |      |      |      |      |      |      |      |      |      | 2    | 4    | 4    | 2    | 3    | 4    | 7    | 6    | 3    |
| 165015 | Brandeis University                         |      |      |      |      |      | 22   | 6    | 9    | 14   | 9    | 23   | 18   | 19   | 23   | 23   | 24   | 21   | 15   | 23   | 18   | 32   | 21   |
| 230038 | Brigham Young University                    |      |      |      |      |      |      |      |      |      |      |      |      |      | 10   | 40   | 57   | 56   | 89   | 67   | 78   | 78   | 61   |
| 217156 | Brown University                            | 22   | 24   | 19   | 21   | 17   | 38   | 30   | 21   | 41   | 44   | 31   | 38   | 60   | 48   | 59   | 56   | 51   | 58   | 60   | 58   | 67   | 47   |
| 211291 | Bucknell University                         |      |      |      |      |      |      |      |      |      |      |      |      |      |      |      |      |      |      |      |      | 2    | 14   |
| 110404 | California Institute of Technology          |      |      |      |      |      |      |      |      |      |      |      |      |      |      |      |      |      |      |      |      | 4    | 3    |
| 173258 | Carleton College                            |      |      |      |      |      |      |      |      | 2    | 1    | 3    | 1    | 1    | 1    | 2    | 4    | 4    | 2    | 3    | 4    | 0    | 0    |
| 211440 | Carnegie Mellon University                  |      |      |      |      |      |      |      |      |      |      |      |      |      |      |      |      |      |      |      |      |      | 1    |
| 238476 | Carthage College                            |      |      |      |      |      |      |      |      |      |      |      |      |      |      | 0    | 3    | 3    | 4    | 3    | 4    | 5    | 3    |
| 211468 | Cedar Crest College                         |      |      |      |      |      |      |      |      |      |      |      |      |      | 1    | 2    | 4    | 5    | 3    | 4    | 5    | 5    | 4    |
| 158477 | Centenary College of Louisiana              |      |      |      |      |      |      |      |      |      |      |      |      |      |      |      | 2    | 1    | 6    | 2    | 1    | 6    | 2    |
| 169248 | Central Michigan University                 |      |      |      |      |      |      |      |      |      |      |      |      |      | 2    | 1    | 9    | 6    | 11   | 13   | 20   | 9    | 8    |
| 211556 | Chatham University                          |      |      |      |      |      |      |      |      |      |      |      |      | 3    | 2    | 2    |      |      |      |      |      |      |      |
| 112260 | Claremont McKenna College                   |      |      |      |      |      |      |      |      |      |      |      |      |      |      | 3    | 10   | 7    | 6    | 4    | 14   | 5    | 10   |
| 153144 | Coe College                                 |      |      |      |      |      |      |      |      |      |      |      |      |      |      |      |      |      |      |      |      | 0    | 0    |
| 161086 | Colby College                               |      |      |      |      |      |      |      |      |      |      |      |      |      |      |      | 1    | 4    | 8    | 4    | 13   | 10   | 8    |
| 190099 | Colgate University                          |      | 1    | 9    | 4    | 8    | 11   | 6    | 8    | 1    | 11   | 11   | 11   | 17   | 9    | 18   | 17   | 17   | 25   | 28   | 21   | 18   | 19   |
| 126678 | Colorado College                            |      |      |      |      |      |      |      |      |      |      | 9    | 6    | 11   | 7    | 13   | 10   | 10   | 10   | 15   | 4    | 11   | 8    |
| 190150 | Columbia University in the City of New York |      |      |      |      |      |      |      |      |      |      |      |      |      |      |      |      |      |      |      | 47   | 42   | 37   |
| 128902 | Connecticut College                         |      |      |      |      |      |      |      |      |      |      |      | 1    | 2    | 3    | 5    | 13   | 13   | 6    | 12   | 7    | 9    | 8    |
| 182670 | Dartmouth College                           |      |      |      |      |      |      |      |      |      |      |      |      |      | 8    | 1    | 5    |      | 3    | 12   | 15   | 23   | 30   |
| 212009 | Dickinson College                           |      |      |      |      |      |      |      |      |      |      |      |      |      |      |      |      |      |      | 2    | 4    | 9    | 12   |
| 153269 | Drake University                            |      |      |      |      |      |      |      |      |      |      |      |      |      |      |      |      |      | 2    | 1    | 5    | 8    | 9    |
| 184348 | Drew University                             |      |      |      |      |      |      |      |      |      |      |      |      | 4    | 11   | 7    | 11   | 6    | 5    | 6    | 12   | 8    | 8    |
| 212133 | Eastern University                          |      |      |      |      |      |      |      |      |      |      |      |      |      |      |      |      |      |      |      |      |      | 1    |
| 165671 | Emmanuel College                            |      |      |      |      |      |      |      |      |      |      |      |      |      |      |      |      |      |      | 0    | 6    | 3    | 5    |
| 139658 | Emory University                            |      |      |      |      |      |      |      |      |      |      |      | 10   | 49   | 76   | 79   | 103  | 94   | 79   | 104  | 113  | 92   | 84   |
| 129242 | Fairfield University                        |      |      |      |      |      |      |      |      |      |      | 1    | 3    | 1    | 2    | 3    | 3    | 0    | 0    | 0    | 0    | 0    | 0    |
| 212577 | Franklin and Marshall College               |      |      |      |      |      |      |      |      |      |      |      |      |      |      | 19   |      |      | 14   | 22   | 16   | 28   | 14   |
| 218070 | Furman University                           |      |      |      |      |      |      |      |      |      |      |      |      |      |      |      |      |      | 2    | 11   | 8    | 11   | 12   |
| 232186 | George Mason University                     |      |      |      |      |      |      |      |      |      |      |      |      |      |      |      |      |      |      |      |      |      | 3    |
| 191515 | Hamilton College                            |      |      |      |      |      |      |      |      |      |      |      |      | 3    | 8    | 11   | 11   | 6    | 10   | 9    | 11   | 6    | 15   |
| 203128 | Hiram College                               |      |      |      |      |      |      |      |      |      |      |      |      |      |      |      |      |      | 0    | 0    | 1    | 2    | 2    |
| 151351 | Indiana University-Bloomington              |      |      |      |      |      |      |      |      |      |      |      |      |      |      |      |      |      |      |      |      | 8    | 17   |
| 162928 | Johns Hopkins University                    |      |      |      |      |      |      |      |      |      |      | 1    | 24   | 40   | 48   | 51   | 44   | 51   | 55   | 64   | 63   | 91   | 75   |
| 203535 | Kenyon College                              |      |      |      |      |      |      |      |      |      |      |      | 1    | 9    | 6    | 3    | 3    | 10   | 4    | 9    | 7    | 3    | 8    |
| 220516 | King College                                |      |      |      |      |      |      |      |      |      |      |      |      |      |      |      |      |      |      | 1    | 1    | 1    | 5    |

| UnitID | Institution Name                                   | 1986 | 1987 | 1988 | 1989 | 1990 | 1991 | 1992 | 1993 | 1994 | 1995 | 1996 | 1997 | 1999 | 2000 | 2001 | 2002 | 2003 | 2004 | 2005 | 2006 | 2007 | 2008 |
|--------|----------------------------------------------------|------|------|------|------|------|------|------|------|------|------|------|------|------|------|------|------|------|------|------|------|------|------|
| 213321 | King's College                                     |      |      |      |      |      |      |      |      |      |      |      |      |      |      |      | 16   | 8    | 12   | 3    | 14   | 5    | 10   |
| 146427 | Knox College                                       |      |      |      |      |      |      |      |      |      |      |      |      |      |      |      |      |      |      | 0    | 1    | 5    | 3    |
| 213385 | Lafayette College                                  |      |      |      |      |      |      |      |      |      |      |      |      |      |      | 5    | 15   | 15   | 27   | 23   | 18   | 15   | 11   |
| 213543 | Lehigh University                                  |      |      |      |      |      |      |      |      |      |      |      |      |      |      |      |      |      |      |      |      | 15   | 32   |
| 173902 | Macalester College                                 |      |      |      |      |      |      |      |      |      |      | 3    | 4    | 10   | 2    | 0    | 1    | 5    | 5    | 8    | 8    | 8    | 5    |
| 166683 | Massachusetts Institute of Technology              |      |      |      |      |      |      |      |      |      |      |      |      |      |      | 21   | 29   | 18   |      | 24   | 31   | 32   | 45   |
| 230959 | Middlebury College                                 |      |      |      |      |      |      |      |      |      |      |      |      |      | 1    | 5    | 8    | 24   | 21   | 23   | 18   | 15   | 24   |
| 214157 | Moravian College and Moravian Theological Seminary |      |      |      |      |      |      |      |      |      |      |      |      |      |      |      |      |      |      |      | 0    | 0    | 1    |
| 166939 | Mount Holyoke College                              |      |      |      |      |      |      |      |      |      | 10   | 20   | 13   | 24   | 14   | 11   | 21   | 15   | 16   | 15   | 7    | 11   | 20   |
| 204185 | Mount Union College                                |      |      |      |      |      |      |      |      |      |      |      |      |      |      |      |      |      |      | 1    | 2    | 3    | 4    |
| 214175 | Muhlenberg College                                 |      |      |      |      |      |      |      |      |      |      |      |      |      |      | 1    |      | 0    | 3    | 10   | 18   | 10   | 15   |
| 204264 | Muskingum University                               |      |      |      |      |      |      | 2    | 0    | 5    | 4    | 2    | 4    | 4    | 4    | 2    | 6    | 5    | 3    | 3    | 4    | 0    | 0    |
| 193900 | New York University                                |      |      |      |      |      |      | 4    | 9    | 14   | 15   | 15   | 11   | 13   | 12   | 12   | 18   | 18   | 21   | 17   | 16   | 22   | 17   |
| 167358 | Northeastern University                            |      |      |      |      |      |      |      |      | 2    | 3    | 5    | 11   | 13   | 12   | 22   | 18   | 19   | 24   | 17   | 17   | 43   | 43   |
| 147767 | Northwestern University                            | 21   | 24   | 16   | 15   | 1    |      |      |      | 1    |      |      |      |      |      | 0    | 0    | 0    | 0    | 0    | 0    | 0    | 0    |
| 204501 | Oberlin College                                    | 6    | 8    | 12   | 11   | 15   | 17   | 11   | 14   | 15   | 21   | 29   | 12   | 10   | 14   | 16   | 13   | 9    | 18   | 21   | 15   | 31   | 21   |
| 204909 | Ohio Wesleyan University                           |      |      |      |      |      |      |      |      |      |      |      |      | 1    |      | 2    | 1    | 0    | 0    | 3    | 0    | 1    | 1    |
| 121257 | Pitzer College                                     |      |      |      |      |      |      |      |      |      |      |      |      | 0    | 1    | 1    | 2    | 1    | 5    | 2    | 4    | 3    | 4    |
| 121345 | Pomona College                                     |      |      |      |      |      |      |      | 1    | 11   | 11   | 17   | 15   | 22   | 13   | 13   | 21   | 10   | 20   | 25   | 21   | 24   |      |
| 127918 | Regis University                                   |      |      |      |      |      |      |      | 1    |      |      |      |      | 9    | 1    | 6    |      | 3    | 4    | 2    | 7    | 14   | 7    |
| 221351 | Rhodes College                                     |      |      |      |      |      |      |      |      |      |      |      |      |      |      |      |      |      |      |      | 3    | 5    | 8    |
| 154235 | Saint Ambrose University                           |      |      |      |      |      |      |      |      |      |      |      |      |      |      |      |      |      |      | 2    | 3    | 3    | 2    |
| 123165 | Scripps College                                    |      |      |      |      |      |      |      |      |      |      |      |      | 0    |      | 1    | 5    | 3    | 6    | 8    | 9    | 7    | 7    |
| 195526 | Skidmore College                                   |      |      |      |      |      |      |      |      |      |      |      |      |      |      |      | 9    | 12   | 12   | 2    | 8    | 13   | 9    |
| 167835 | Smith College                                      |      |      |      |      |      |      |      |      |      | 1    | 4    | 15   | 26   | 26   | 18   | 12   | 25   | 23   | 21   | 26   | 28   |      |
| 195216 | St Lawrence University                             |      |      |      |      |      |      |      |      |      |      |      |      |      |      |      | 7    | 10   | 15   | 11   | 11   | 14   | 16   |
| 167996 | Stonehill College                                  |      |      |      |      |      |      |      |      |      |      |      |      |      |      |      |      |      |      |      | 2    | 2    | 5    |
| 228875 | Texas Christian University                         | 1    | 2    | 2    | 1    | 6    |      | 8    | 11   | 9    | 9    | 6    | 3    | 5    | 3    | 4    | 5    | 1    | 1    | 3    | 5    | 8    | 5    |
| 206589 | The College of Wooster                             |      |      |      |      |      |      |      |      |      |      |      |      |      |      |      |      |      |      |      |      |      | 1    |
| 228787 | The University of Texas at Dallas                  |      |      |      |      |      |      |      |      |      |      | 1    | 6    | 8    | 14   | 14   | 18   | 10   | 24   | 29   | 31   | 59   | 49   |
| 216357 | Thiel College                                      |      |      |      |      |      |      |      |      |      |      |      |      |      |      |      |      |      |      |      | 0    | 0    | 0    |
| 130590 | Trinity College                                    |      |      |      |      |      | 10   | 4    | 9    | 19   | 17   | 12   | 19   | 12   | 5    | 4    | 12   | 8    | 8    | 13   | 10   | 12   | 16   |
| 229267 | Trinity University                                 |      |      |      |      |      |      |      |      |      |      |      |      |      |      |      |      |      |      | 0    | 3    | 14   | 10   |
| 160755 | Tulane University of Louisiana                     |      |      |      |      |      |      |      |      |      |      |      |      |      | 4    | 14   | 39   | 35   | 61   | 29   | 66   | 63   | 60   |
| 196866 | Union College                                      |      |      |      |      |      |      |      |      |      |      |      |      |      |      |      |      | 1    | 9    | 15   | 25   | 16   | 14   |
| 110635 | University of California-Berkeley                  | 17   | 15   | 15   | 15   | 15   |      |      |      |      |      |      |      | 0    |      |      |      |      |      |      |      |      |      |
| 110653 | University of California-Irvine                    |      |      |      |      |      |      |      |      |      |      |      |      |      | 11   | 20   | 23   | 29   | 31   | 23   | 30   | 26   | 23   |
| 110662 | University of California-Los Angeles               |      |      |      |      |      |      |      | 4    | 20   | 35   | 43   | 45   | 76   | 87   | 79   | 66   | 64   | 73   | 90   | 79   | 87   | 97   |
| 110671 | University of California-Riverside                 |      |      |      |      |      |      |      |      |      |      |      |      | 15   | 14   | 17   | 23   | 25   | 15   | 20   | 20   | 43   | 35   |
| 110714 | University of California-Santa Cruz                |      |      |      |      |      |      |      |      |      |      |      |      |      |      | 2    | 1    | 18   | 23   | 19   | 22   | 25   | 28   |
| 201885 | University of Cincinnati-Main Campus               |      |      |      |      |      |      |      |      |      |      |      |      |      |      |      |      |      |      |      |      |      | 2    |
| 150534 | University of Evansville                           |      |      |      |      |      |      |      |      |      |      |      |      |      |      |      |      |      |      | 1    | 3    | 2    | 1    |
| 145600 | University of Illinois at Chicago                  |      |      |      |      |      |      |      |      |      |      |      |      |      |      |      |      |      |      | 4    | 13   | 24   | 23   |
| 135726 | University of Miami                                |      |      |      |      |      |      |      |      |      |      |      |      |      |      |      | 5    | 13   | 25   | 34   | 34   | 47   | 39   |
| 170976 | University of Michigan-Ann Arbor                   |      |      |      |      |      |      |      |      |      |      |      |      |      |      |      |      |      |      | 4    | 39   | 87   | 142  |

| <b>UnitID</b> | <b>Institution Name</b>                    | <b>1986</b> | <b>1987</b> | <b>1988</b> | <b>1989</b> | <b>1990</b> | <b>1991</b> | <b>1992</b> | <b>1993</b> | <b>1994</b> | <b>1995</b> | <b>1996</b> | <b>1997</b> | <b>1999</b> | <b>2000</b> | <b>2001</b> | <b>2002</b> | <b>2003</b> | <b>2004</b> | <b>2005</b> | <b>2006</b> | <b>2007</b> | <b>2008</b> |              |
|---------------|--------------------------------------------|-------------|-------------|-------------|-------------|-------------|-------------|-------------|-------------|-------------|-------------|-------------|-------------|-------------|-------------|-------------|-------------|-------------|-------------|-------------|-------------|-------------|-------------|--------------|
| 174066        | University of Minnesota-Twin Cities        |             |             |             |             |             |             |             |             |             |             |             |             | 15          | 13          | 15          | 19          | 20          | 13          | 27          | 22          | 26          | 31          |              |
| 182290        | University of Nevada-Reno                  |             |             |             |             |             |             |             |             |             |             |             |             |             |             |             |             |             |             |             |             |             | 2           |              |
| 215062        | University of Pennsylvania                 |             |             |             |             |             |             |             |             |             |             |             |             |             |             |             | 108         | 74          | 108         | 92          | 106         | 102         | 94          |              |
| 215293        | University of Pittsburgh-Pittsburgh Campus | 20          | 25          | 28          | 20          | 32          | 29          | 27          | 28          | 33          | 50          | 38          | 42          | 48          | 49          | 50          | 48          | 58          | 54          | 48          | 67          | 77          | 89          |              |
| 215929        | University of Scranton                     |             |             |             |             |             |             |             |             | 8           | 7           | 2           | 3           | 14          | 6           | 7           | 9           | 6           | 3           | 10          | 8           | 12          | 10          |              |
| 123961        | University of Southern California          |             |             |             |             |             | 2           |             | 2           |             |             |             |             |             |             |             | 5           | 9           | 13          | 26          | 33          | 50          | 77          |              |
| 174914        | University of St Thomas                    |             |             |             |             |             |             |             |             |             |             |             |             |             |             |             |             |             |             |             |             |             | 0           |              |
| 236948        | University of Washington-Seattle Campus    |             |             |             |             |             |             |             |             |             |             |             |             | 17          | 33          | 45          |             |             |             |             |             |             |             |              |
| 216524        | Ursinus College                            |             |             |             |             |             |             |             |             |             |             |             |             |             |             |             |             | 1           | 2           | 4           | 5           | 4           | 10          |              |
| 221999        | Vanderbilt University                      |             |             |             |             |             |             |             |             |             |             |             |             | 19          | 25          | 40          | 50          | 38          | 39          | 24          | 43          | 35          | 33          |              |
| 197133        | Vassar College                             |             |             |             |             |             |             |             |             |             |             |             |             |             |             |             |             | 10          | 26          | 17          | 18          | 24          | 17          |              |
| 234207        | Washington and Lee University              |             |             |             |             | 1           | 1           | 1           | 4           | 5           | 4           | 1           | 4           | 5           | 1           | 3           | 6           | 4           | 5           | 6           | 10          | 5           | 9           |              |
| 236939        | Washington State University                |             |             |             |             |             |             |             |             |             |             |             |             | 2           | 1           | 4           | 20          | 23          | 13          | 22          | 26          | 27          | 26          |              |
| 179867        | Washington University in St Louis          |             |             |             |             |             |             |             |             |             |             |             |             |             |             |             |             |             |             |             | 2           | 10          | 32          |              |
| 168218        | Wellesley College                          |             |             |             |             |             |             |             |             |             |             |             |             | 13          | 10          | 22          | 25          | 23          | 20          | 25          | 14          | 32          | 21          |              |
| 237011        | Western Washington University              |             |             |             |             |             |             |             |             |             |             |             |             |             |             |             |             |             |             |             |             | 6           | 7           |              |
| 230807        | Westminster College                        |             |             |             |             |             |             |             |             |             |             |             |             | 2           | 3           | 5           |             |             |             |             |             | 1           | 2           |              |
| 125727        | Westmont College                           |             |             |             |             |             |             |             |             |             |             |             |             |             |             | 6           |             |             |             |             |             |             |             |              |
| <b>COUNT</b>  | <b>108</b>                                 | <b>7</b>    | <b>8</b>    | <b>9</b>    | <b>9</b>    | <b>10</b>   | <b>10</b>   | <b>10</b>   | <b>14</b>   | <b>17</b>   | <b>17</b>   | <b>25</b>   | <b>28</b>   | <b>45</b>   | <b>49</b>   | <b>61</b>   | <b>62</b>   | <b>68</b>   | <b>72</b>   | <b>84</b>   | <b>90</b>   | <b>97</b>   | <b>104</b>  | <b>COUNT</b> |
| <b>SUM</b>    |                                            | <b>95</b>   | <b>110</b>  | <b>111</b>  | <b>99</b>   | <b>105</b>  | <b>137</b>  | <b>105</b>  | <b>139</b>  | <b>190</b>  | <b>261</b>  | <b>294</b>  | <b>333</b>  | <b>625</b>  | <b>711</b>  | <b>894</b>  | <b>1146</b> | <b>1114</b> | <b>1299</b> | <b>1422</b> | <b>1677</b> | <b>1972</b> | <b>2069</b> | <b>SUM</b>   |
| <b>YEAR</b>   |                                            | <b>1986</b> | <b>1987</b> | <b>1988</b> | <b>1989</b> | <b>1990</b> | <b>1991</b> | <b>1992</b> | <b>1993</b> | <b>1994</b> | <b>1995</b> | <b>1996</b> | <b>1997</b> | <b>1999</b> | <b>2000</b> | <b>2001</b> | <b>2002</b> | <b>2003</b> | <b>2004</b> | <b>2005</b> | <b>2006</b> | <b>2007</b> | <b>2008</b> |              |
